# Supplementary material for: Deep Evolutionary Comparison of Gene Expression Identifies Parallel Recruitment of Trans-Factors in Two Independent Origins of C4 Photosynthesis
Source: PLoS Genet. 2014 Jun 5;10(6):e1004365. doi: 10.1371/journal.pgen.1004365 (PMC4046924; doi:10.1371/journal.pgen.1004365)
Supplement: Table S3 — GO terms that are different between specific tissues within the C. gynandra leaf gradient. (XLSX) [file pgen.1004365.s017.xlsx]

## Sheet: legend
	Table S3: GO terms that are different between specific tissues within the C. gynandra leaf gradient.

## Sheet: all GO terms A and D summary
Cluster	GO	Description	p-val	#genes_in_GO	#genes_in_list	#GO_in_list
D2	GO:0001872	(1->3)-beta-D-glucan binding	0.00248724	5	478	3
A6	GO:0034768	(E)-beta-ocimene synthase activity	0.0385687	2	494	2
A6	GO:0080064	4,4-dimethyl-9beta,19-cyclopropylsterol-4alpha-methyl oxidase activity	0.0330847	2	494	2
A6	GO:0016207	4-coumarate-CoA ligase activity	0.0399323	8	494	3
D12	GO:0030686	90S preribosome	9.57245e-05	4	117	3
D6	GO:0009738	abscisic acid mediated signaling pathway	0.00865747	51	1622	12
D6	GO:0016881	acid-amino acid ligase activity	0.00300882	53	1622	12
A6	GO:0015629	actin cytoskeleton	0.0440533	11	494	3
D12	GO:0009955	adaxial/abaxial pattern specification	0.00922996	3	117	2
D3	GO:0006168	adenine salvage	0.00599681	5	2443	4
D13	GO:0004001	adenosine kinase activity	0.0198942	2	280	2
D13	GO:0006169	adenosine salvage	0.0198942	2	280	2
A6	GO:0018685	alkane 1-monooxygenase activity	0.0227128	6	494	3
D3	GO:0005680	anaphase-promoting complex	0.0289337	5	2443	4
A6	GO:0031225	anchored to membrane	0.00924118	146	494	11
A6	GO:0046658	anchored to plasma membrane	0.0489918	57	494	6
A13	GO:0016209	antioxidant activity	0.0240589	11	202	3
A8	GO:0019786	APG8-specific protease activity	0.0222384	2	297	2
A3	GO:0048046	apoplast	3.08891e-05	235	315	15
A4	GO:0048046	apoplast	0.000933145	235	91	8
A6	GO:0048046	apoplast	0.000837303	235	494	17
A13	GO:0048046	apoplast	0.00659213	235	202	10
D13	GO:0048046	apoplast	0.0370237	235	280	10
D13	GO:0009073	aromatic amino acid family biosynthetic process	0.0239914	10	280	3
A8	GO:0019776	Atg8 ligase activity	0.0222384	2	297	2
D2	GO:0005524	ATP binding	1.14209e-07	1601	478	76
D6	GO:0005524	ATP binding	2.08461e-05	1601	1622	169
A6	GO:0015991	ATP hydrolysis coupled proton transport	0.000283751	30	494	7
A4	GO:0015986	ATP synthesis coupled proton transport	0.0452951	30	91	3
D3	GO:0008026	ATP-dependent helicase activity	2.61684e-05	97	2443	36
D10	GO:0008026	ATP-dependent helicase activity	0.00476311	97	1268	20
D6	GO:0006914	autophagy	0.00425945	18	1622	7
D3	GO:0005488	binding	3.26871e-11	491	2443	131
A6	GO:0008150	biological_process	0.0362521	4367	494	108
A8	GO:0008150	biological_process	0.0222384	4367	297	74
D3	GO:0008150	biological_process	2.84222e-59	4367	2443	702
D4	GO:0008150	biological_process	5.96901e-12	4367	724	195
D6	GO:0008150	biological_process	4.54023e-25	4367	1622	428
D8	GO:0008150	biological_process	9.09187e-32	4367	950	303
D9	GO:0008150	biological_process	3.72674e-06	4367	353	101
D10	GO:0008150	biological_process	1.56298e-29	4367	1268	367
A3	GO:0009058	biosynthetic process	0.00602547	134	315	9
A10	GO:0009058	biosynthetic process	0.0139368	134	105	6
A3	GO:4444444	C4 genes	0.00052629	34	315	6
D6	GO:0005516	calmodulin binding	0.00593785	144	1622	24
D6	GO:0015144	carbohydrate transmembrane transporter activity	0.00450705	63	1622	15
A3	GO:0003824	catalytic activity	4.05215e-08	1035	315	40
A6	GO:0003824	catalytic activity	9.59309e-07	1035	494	53
A8	GO:0003824	catalytic activity	0.00425625	1035	297	31
D8	GO:0003824	catalytic activity	0.016461	1035	950	64
D12	GO:0030054	cell junction	0.00922996	3	117	2
D2	GO:0008283	cell proliferation	1.09307e-08	36	478	11
A3	GO:0045454	cell redox homeostasis	0.00459692	109	315	8
A6	GO:0005618	cell wall	0.0034122	315	494	19
D2	GO:0005618	cell wall	0.013601	315	478	17
D12	GO:0005618	cell wall	4.37712e-06	315	117	12
D13	GO:0005618	cell wall	0.00200699	315	280	15
A6	GO:0042545	cell wall modification	0.0330847	30	494	5
D13	GO:0044262	cellular carbohydrate metabolic process	0.0075751	16	280	4
D12	GO:0007047	cellular cell wall organization	0.03769	6	117	2
D11	GO:0006073	cellular glucan metabolic process	0.0113166	19	236	4
D2	GO:0044267	cellular protein metabolic process	1.61645e-06	20	478	8
D13	GO:0071258	cellular response to gravity	0.0223054	2	280	2
D6	GO:0009267	cellular response to starvation	0.0287622	4	1622	3
A8	GO:0005575	cellular_component	0.0394271	2827	297	53
D3	GO:0005575	cellular_component	6.25012e-26	2827	2443	441
D4	GO:0005575	cellular_component	3.48865e-06	2827	724	129
D6	GO:0005575	cellular_component	1.74298e-11	2827	1622	270
D8	GO:0005575	cellular_component	1.01232e-12	2827	950	181
D9	GO:0005575	cellular_component	0.0459394	2827	353	61
D10	GO:0005575	cellular_component	7.31887e-20	2827	1268	253
D11	GO:0005575	cellular_component	0.00503329	2827	236	48
A3	GO:0016168	chlorophyll binding	4.80731e-06	28	315	7
A8	GO:0016168	chlorophyll binding	0.0497969	28	297	4
A3	GO:0009507	chloroplast	1.11546e-70	2206	315	147
A4	GO:0009507	chloroplast	2.8942e-13	2206	91	36
A6	GO:0009507	chloroplast	2.25766e-13	2206	494	101
A8	GO:0009507	chloroplast	0.0047092	2206	297	49
A10	GO:0009507	chloroplast	7.35528e-10	2206	105	36
A13	GO:0009507	chloroplast	3.5049e-19	2206	202	65
D1	GO:0009507	chloroplast	5.94498e-05	2206	126	32
D2	GO:0009507	chloroplast	2.82382e-16	2206	478	103
D7	GO:0009507	chloroplast	4.56264e-05	2206	27	13
D8	GO:0009507	chloroplast	4.94705e-11	2206	950	148
D9	GO:0009507	chloroplast	6.39772e-05	2206	353	61
D10	GO:0009507	chloroplast	0.0049373	2206	1268	154
D12	GO:0009507	chloroplast	0.00922996	2206	117	23
D13	GO:0009507	chloroplast	0.0082924	2206	280	46
A3	GO:0009941	chloroplast envelope	1.02982e-26	491	315	48
A4	GO:0009941	chloroplast envelope	8.9454e-05	491	91	12
A6	GO:0009941	chloroplast envelope	1.76191e-06	491	494	32
A10	GO:0009941	chloroplast envelope	0.00583547	491	105	11
D2	GO:0009941	chloroplast envelope	0.0119961	491	478	22
D6	GO:0009941	chloroplast envelope	0.0241029	491	1622	52
D7	GO:0009941	chloroplast envelope	0.000405113	491	27	7
D8	GO:0009941	chloroplast envelope	0.00333838	491	950	38
A3	GO:0009706	chloroplast inner membrane	0.0092636	38	315	5
D2	GO:0009658	chloroplast organization	0.0444691	72	478	7
A3	GO:0030095	chloroplast photosystem II	0.000204306	18	315	5
A3	GO:0009570	chloroplast stroma	2.94723e-25	531	315	48
A4	GO:0009570	chloroplast stroma	0.00644247	531	91	10
A6	GO:0009570	chloroplast stroma	2.5299e-06	531	494	33
A10	GO:0009570	chloroplast stroma	0.00870062	531	105	11
A13	GO:0009570	chloroplast stroma	0.00659213	531	202	15
D7	GO:0009570	chloroplast stroma	3.87281e-06	531	27	9
D8	GO:0009570	chloroplast stroma	4.05113e-09	531	950	54
D9	GO:0009570	chloroplast stroma	0.0127905	531	353	21
A3	GO:0009534	chloroplast thylakoid	7.63355e-50	195	315	50
A4	GO:0009534	chloroplast thylakoid	0.000346496	195	91	8
A8	GO:0009534	chloroplast thylakoid	0.00114982	195	297	13
A10	GO:0009534	chloroplast thylakoid	1.0294e-05	195	105	10
A13	GO:0009534	chloroplast thylakoid	0.000226791	195	202	11
A3	GO:0009543	chloroplast thylakoid lumen	8.21819e-12	65	315	14
A13	GO:0009543	chloroplast thylakoid lumen	0.00563341	65	202	6
A3	GO:0009535	chloroplast thylakoid membrane	1.17223e-62	285	315	65
A4	GO:0009535	chloroplast thylakoid membrane	9.05777e-06	285	91	11
A8	GO:0009535	chloroplast thylakoid membrane	0.00252698	285	297	14
A10	GO:0009535	chloroplast thylakoid membrane	1.33938e-05	285	105	11
A13	GO:0009535	chloroplast thylakoid membrane	8.8654e-09	285	202	18
D10	GO:0016568	chromatin modification	0.00539821	5	1268	4
D2	GO:0000775	chromosome, centromeric region	0.0351476	9	478	3
D3	GO:0005801	cis-Golgi network	0.04832	7	2443	4
D3	GO:0030130	clathrin coat of trans-Golgi network vesicle	0.0484385	4	2443	4
D3	GO:0030125	clathrin vesicle coat	0.04832	11	2443	5
D13	GO:0030126	COPI vesicle coat	0.0223054	8	280	3
A6	GO:0005507	copper ion binding	0.0180353	174	494	12
D13	GO:0005507	copper ion binding	0.0198942	174	280	9
A6	GO:0005375	copper ion transmembrane transporter activity	0.00352563	10	494	4
A6	GO:0009805	coumarin biosynthetic process	0.0353403	2	494	2
D3	GO:0080008	CUL4 RING ubiquitin ligase complex	7.6889e-05	105	2443	33
D2	GO:0004693	cyclin-dependent protein kinase activity	0.0366886	23	478	4
D2	GO:0000307	cyclin-dependent protein kinase holoenzyme complex	0.0209496	2	478	2
D1	GO:0016538	cyclin-dependent protein kinase regulator activity	0.000661229	20	126	4
D2	GO:0000910	cytokinesis	0.0255129	28	478	5
D2	GO:0005737	cytoplasm	0.000149611	655	478	32
D3	GO:0005737	cytoplasm	2.35727e-07	655	2443	116
D6	GO:0005737	cytoplasm	0.00622907	655	1622	69
D10	GO:0005737	cytoplasm	0.00659362	655	1268	58
D13	GO:0005737	cytoplasm	0.00270602	655	280	22
D3	GO:0000932	cytoplasmic mRNA processing body	0.0484385	7	2443	5
A6	GO:0007010	cytoskeleton organization	0.0465024	21	494	4
A6	GO:0005829	cytosol	0.00217007	1239	494	47
D2	GO:0005829	cytosol	2.36672e-14	1239	478	71
D3	GO:0005829	cytosol	8.45847e-32	1239	2443	275
D4	GO:0005829	cytosol	0.0414725	1239	724	63
D10	GO:0005829	cytosol	2.02292e-06	1239	1268	113
D12	GO:0005829	cytosol	9.07547e-20	1239	117	38
D13	GO:0005829	cytosol	4.09352e-23	1239	280	67
D2	GO:0022625	cytosolic large ribosomal subunit	5.8978e-25	89	478	26
D10	GO:0022625	cytosolic large ribosomal subunit	0.00151611	89	1268	12
D12	GO:0022625	cytosolic large ribosomal subunit	2.35378e-28	89	117	21
D2	GO:0022626	cytosolic ribosome	2.11465e-20	156	478	29
D10	GO:0022626	cytosolic ribosome	0.000890069	156	1268	19
D12	GO:0022626	cytosolic ribosome	1.52836e-29	156	117	25
D13	GO:0022626	cytosolic ribosome	0.0117099	156	280	8
D2	GO:0022627	cytosolic small ribosomal subunit	2.83049e-15	65	478	17
D3	GO:0022627	cytosolic small ribosomal subunit	0.00665134	65	2443	12
D10	GO:0022627	cytosolic small ribosomal subunit	0.000380967	65	1268	11
D12	GO:0022627	cytosolic small ribosomal subunit	4.37712e-06	65	117	7
D13	GO:0022627	cytosolic small ribosomal subunit	0.0119752	65	280	5
D10	GO:0003684	damaged DNA binding	0.0120603	31	1268	9
A6	GO:0042742	defense response to bacterium	0.0407476	171	494	11
A6	GO:0002229	defense response to oomycetes	0.0456298	9	494	3
D1	GO:0003677	DNA binding	0.000191164	1080	126	22
D2	GO:0003677	DNA binding	4.13983e-11	1080	478	59
D3	GO:0003677	DNA binding	0.00108608	1080	2443	157
D4	GO:0003677	DNA binding	6.4555e-23	1080	724	107
D6	GO:0003677	DNA binding	2.98447e-16	1080	1622	148
D10	GO:0003677	DNA binding	3.03641e-06	1080	1268	100
D11	GO:0003677	DNA binding	0.00168525	1080	236	27
D4	GO:0042023	DNA endoreduplication	0.0251787	16	724	5
D10	GO:0006310	DNA recombination	0.0040326	30	1268	10
D10	GO:0006281	DNA repair	2.02292e-06	124	1268	27
D2	GO:0006260	DNA replication	1.37257e-16	63	478	21
D10	GO:0006260	DNA replication	0.000214242	63	1268	17
D2	GO:0006268	DNA unwinding involved in replication	4.38236e-06	9	478	6
D2	GO:0008094	DNA-dependent ATPase activity	4.38236e-06	31	478	9
D2	GO:0006270	DNA-dependent DNA replication initiation	4.63689e-07	12	478	7
D3	GO:0003899	DNA-directed RNA polymerase activity	0.0276534	45	2443	14
D3	GO:0005665	DNA-directed RNA polymerase II, core complex	0.0006809	11	2443	7
D3	GO:0000419	DNA-directed RNA polymerase V complex	0.0376634	9	2443	5
A3	GO:0009055	electron carrier activity	0.0140871	325	315	13
A6	GO:0009055	electron carrier activity	0.000506511	325	494	21
A3	GO:0045156	electron transporter, transferring electrons within the cyclic electron transport pathway of photosynthesis activity	2.38912e-08	8	315	6
A3	GO:0045157	electron transporter, transferring electrons within the noncyclic electron transport pathway of photosynthesis activity	0.0135798	2	315	2
D2	GO:0009790	embryo development	0.00158197	71	478	9
D2	GO:0009793	embryo development ending in seed dormancy	0.00309677	288	478	18
D3	GO:0009793	embryo development ending in seed dormancy	0.000595848	288	2443	62
D10	GO:0009793	embryo development ending in seed dormancy	7.29526e-07	288	1268	45
D2	GO:0009558	embryo sac cellularization	0.0100803	5	478	3
A6	GO:0012505	endomembrane system	1.37725e-05	1263	494	53
D6	GO:0012505	endomembrane system	0.0278813	1263	1622	109
D12	GO:0000447	endonucleolytic cleavage in ITS1 to separate SSU-rRNA from 5.8S rRNA and LSU-rRNA from tricistronic rRNA transcript (SSU-rRNA, 5.8S rRNA, LSU-rRNA)	0.0164766	4	117	2
D12	GO:0000461	endonucleolytic cleavage to generate mature 3'-end of SSU-rRNA from (SSU-rRNA, 5.8S rRNA, LSU-rRNA)	0.0164766	4	117	2
D10	GO:0004175	endopeptidase activity	4.46207e-05	23	1268	9
D3	GO:0005783	endoplasmic reticulum	5.52586e-15	306	2443	81
A3	GO:0008047	enzyme activator activity	0.00133868	13	315	4
A6	GO:0004857	enzyme inhibitor activity	5.42368e-05	45	494	9
D13	GO:0006888	ER to Golgi vesicle-mediated transport	0.0310714	29	280	4
D6	GO:0009873	ethylene mediated signaling pathway	0.0278813	30	1622	8
D3	GO:0005852	eukaryotic translation initiation factor 3 complex	0.04832	8	2443	5
A3	GO:0019898	extrinsic to membrane	0.01682	26	315	4
A6	GO:0006633	fatty acid biosynthetic process	0.00367552	76	494	9
A6	GO:0006631	fatty acid metabolic process	0.0362521	31	494	5
A3	GO:0030385	ferredoxin:thioredoxin reductase activity	0.0247178	3	315	2
A3	GO:0008937	ferredoxin-NAD(P) reductase activity	0.0247178	3	315	2
A3	GO:0005528	FK506 binding	0.00732468	20	315	4
D3	GO:0009908	flower development	0.0136403	70	2443	20
A8	GO:0019375	galactolipid biosynthetic process	0.0222384	6	297	3
A11	GO:0010475	galactose-1-phosphate guanylyltransferase (GDP) activity	0.0193185	2	75	2
D2	GO:0048229	gametophyte development	0.0209496	6	478	3
A11	GO:0080048	GDP-D-glucose phosphorylase activity	0.0193185	2	75	2
D6	GO:0010476	gibberellin mediated signaling pathway	0.0261848	3	1622	3
A6	GO:0019761	glucosinolate biosynthetic process	0.00235682	15	494	5
A3	GO:0004356	glutamate-ammonia ligase activity	0.00480472	6	315	3
A3	GO:0006542	glutamine biosynthetic process	0.00710182	7	315	3
A3	GO:0006662	glycerol ether metabolic process	0.0456937	36	315	4
D12	GO:0008466	glycogenin glucosyltransferase activity	0.00922996	3	117	2
A6	GO:0006096	glycolysis	0.0487053	53	494	6
D2	GO:0006177	GMP biosynthetic process	0.0351476	2	478	2
A6	GO:0005794	Golgi apparatus	0.0050194	446	494	23
D3	GO:0005794	Golgi apparatus	6.28198e-15	446	2443	110
D13	GO:0005794	Golgi apparatus	0.00261925	446	280	18
D3	GO:0000139	Golgi membrane	0.0494725	22	2443	8
D2	GO:0005525	GTP binding	0.00948935	198	478	13
D13	GO:0006184	GTP catabolic process	0.0420173	31	280	4
D2	GO:0003924	GTPase activity	0.00248724	93	478	10
D13	GO:0003924	GTPase activity	0.0229135	93	280	7
D6	GO:0031072	heat shock protein binding	0.0278813	106	1622	17
D3	GO:0004386	helicase activity	0.00199692	131	2443	41
D10	GO:0004386	helicase activity	0.000769157	131	1268	27
A6	GO:0020037	heme binding	0.00647356	218	494	15
D8	GO:0034968	histone lysine methylation	0.0137899	12	950	5
A6	GO:0015078	hydrogen ion transmembrane transporter activity	0.0399323	24	494	4
A4	GO:0046933	hydrogen ion transporting ATP synthase activity, rotational mechanism	0.0199572	20	91	3
D4	GO:0016818	hydrolase activity, acting on acid anhydrides, in phosphorus-containing anhydrides	0.033946	29	724	8
D9	GO:0052716	hydroquinone:oxygen oxidoreductase activity	0.0127905	11	353	4
A6	GO:0016021	integral to membrane	0.0385687	637	494	26
D2	GO:0005622	intracellular	6.87402e-20	705	478	58
D3	GO:0005622	intracellular	0.000248982	705	2443	104
D6	GO:0005622	intracellular	0.00317892	705	1622	69
D10	GO:0005622	intracellular	1.65176e-10	705	1268	81
D12	GO:0005622	intracellular	6.018e-19	705	117	30
A6	GO:0015680	intracellular copper ion transport	0.0292292	2	494	2
A6	GO:0043231	intracellular membrane-bounded organelle	0.0474027	10	494	3
D3	GO:0006886	intracellular protein transport	4.73628e-08	157	2443	46
D13	GO:0006886	intracellular protein transport	0.00113703	157	280	11
A6	GO:0005506	iron ion binding	0.000765089	240	494	18
A8	GO:0051536	iron-sulfur cluster binding	0.0436737	46	297	5
A8	GO:0008909	isochorismate synthase activity	0.044027	2	297	2
D6	GO:0016301	kinase activity	0.00141768	669	1622	79
D1	GO:0000776	kinetochore	0.01622	3	126	2
D2	GO:0015934	large ribosomal subunit	4.38304e-07	52	478	10
D10	GO:0015934	large ribosomal subunit	0.0232093	52	1268	8
D12	GO:0015934	large ribosomal subunit	1.04173e-06	52	117	7
D4	GO:0048366	leaf development	5.77025e-05	83	724	15
A3	GO:0030076	light-harvesting complex	1.50243e-05	20	315	6
A8	GO:0030076	light-harvesting complex	0.0222384	20	297	4
A6	GO:0009809	lignin biosynthetic process	0.0330847	31	494	5
D9	GO:0046274	lignin catabolic process	0.0158112	12	353	4
A3	GO:0004471	malate dehydrogenase (decarboxylating) activity	0.0140871	2	315	2
D2	GO:0000462	maturation of SSU-rRNA from tricistronic rRNA transcript (SSU-rRNA, 5.8S rRNA, LSU-rRNA)	0.0149946	2	478	2
A3	GO:0016020	membrane	0.0102524	1526	315	36
A4	GO:0016020	membrane	0.00454295	1526	91	17
A6	GO:0016020	membrane	1.58214e-06	1526	494	66
A13	GO:0016020	membrane	0.00120584	1526	202	30
D6	GO:0016020	membrane	0.0103994	1526	1622	139
D8	GO:0016020	membrane	0.0479323	1526	950	83
D12	GO:0016020	membrane	5.14296e-07	1526	117	26
D13	GO:0016020	membrane	0.000383357	1526	280	42
A3	GO:0008152	metabolic process	1.16123e-07	690	315	31
A6	GO:0008152	metabolic process	3.58684e-06	690	494	39
A8	GO:0008152	metabolic process	0.0394271	690	297	21
D6	GO:0046873	metal ion transmembrane transporter activity	0.042197	28	1622	8
D3	GO:0008168	methyltransferase activity	0.00434156	134	2443	30
D1	GO:0003777	microtubule motor activity	8.2267e-08	56	126	11
D2	GO:0003777	microtubule motor activity	0.00121831	56	478	9
D1	GO:0007018	microtubule-based movement	1.15857e-07	63	126	11
D2	GO:0007018	microtubule-based movement	0.000436877	63	478	10
A13	GO:0042776	mitochondrial ATP synthesis coupled proton transport	0.020651	2	202	2
D8	GO:0006122	mitochondrial electron transport, ubiquinol to cytochrome c	0.0182025	4	950	3
D8	GO:0005743	mitochondrial inner membrane	0.0230403	79	950	11
D3	GO:0005758	mitochondrial intermembrane space	0.00364692	8	2443	5
D8	GO:0031966	mitochondrial membrane	4.98703e-06	22	950	9
A6	GO:0005741	mitochondrial outer membrane	0.0226367	16	494	4
D8	GO:0005753	mitochondrial proton-transporting ATP synthase complex	0.0023992	16	950	6
D8	GO:0005747	mitochondrial respiratory chain complex I	7.86237e-11	51	950	17
D8	GO:0005750	mitochondrial respiratory chain complex III	0.00170333	15	950	6
A6	GO:0005739	mitochondrion	0.019395	787	494	31
D2	GO:0005739	mitochondrion	0.00194443	787	478	33
D3	GO:0005739	mitochondrion	6.33004e-16	787	2443	161
D8	GO:0005739	mitochondrion	8.44061e-11	787	950	73
D10	GO:0005739	mitochondrion	3.64494e-09	787	1268	87
D1	GO:0007094	mitotic cell cycle spindle assembly checkpoint	0.0247273	4	126	2
A3	GO:0003674	molecular_function	0.00710182	3929	315	70
A6	GO:0003674	molecular_function	0.0456298	3929	494	95
A8	GO:0003674	molecular_function	0.00252698	3929	297	71
A13	GO:0003674	molecular_function	0.0361837	3929	202	49
D3	GO:0003674	molecular_function	1.89036e-36	3929	2443	550
D4	GO:0003674	molecular_function	1.5939e-08	3929	724	158
D6	GO:0003674	molecular_function	3.49966e-26	3929	1622	387
D8	GO:0003674	molecular_function	3.27332e-28	3929	950	269
D9	GO:0003674	molecular_function	0.00047054	3929	353	84
D10	GO:0003674	molecular_function	1.34382e-27	3929	1268	319
D11	GO:0003674	molecular_function	2.8511e-05	3929	236	65
D13	GO:0003674	molecular_function	0.0223054	3929	280	60
A10	GO:0043546	molybdopterin cofactor binding	0.0107017	2	105	2
D6	GO:0007275	multicellular organismal development	0.000828427	82	1622	18
A6	GO:0050551	myrcene synthase activity	0.0385687	2	494	2
A3	GO:0051287	NAD binding	0.00491821	51	315	6
A3	GO:0010598	NAD(P)H dehydrogenase complex (plastoquinone)	1.35263e-05	11	315	5
A10	GO:0008940	nitrate reductase activity	0.0107017	2	105	2
A3	GO:0009344	nitrite reductase complex [NAD(P)H]	0.0108082	2	315	2
D6	GO:0006499	N-terminal protein myristoylation	9.12763e-06	292	1622	45
D2	GO:0000790	nuclear chromatin	5.18052e-06	10	478	6
D3	GO:0005635	nuclear envelope	0.0203526	42	2443	15
D4	GO:0016607	nuclear speck	0.0414725	22	724	5
D2	GO:0003676	nucleic acid binding	4.79466e-05	631	478	34
D3	GO:0003676	nucleic acid binding	9.30086e-22	631	2443	166
D4	GO:0003676	nucleic acid binding	0.00728757	631	724	45
D10	GO:0003676	nucleic acid binding	1.88109e-13	631	1268	93
D1	GO:0009295	nucleoid	0.0238568	36	126	4
D2	GO:0009295	nucleoid	2.74002e-07	36	478	10
D2	GO:0005730	nucleolus	2.6323e-19	239	478	35
D3	GO:0005730	nucleolus	0.00115987	239	2443	44
D10	GO:0005730	nucleolus	2.85529e-10	239	1268	41
D12	GO:0005730	nucleolus	1.03952e-09	239	117	14
D13	GO:0005730	nucleolus	0.000216902	239	280	14
D1	GO:0000786	nucleosome	1.82628e-14	35	126	10
D2	GO:0000786	nucleosome	0.0100803	35	478	5
D4	GO:0000786	nucleosome	0.00552118	35	724	6
D1	GO:0006334	nucleosome assembly	9.97034e-14	41	126	10
D2	GO:0006334	nucleosome assembly	0.000254088	41	478	7
D4	GO:0006334	nucleosome assembly	0.00234474	41	724	7
D2	GO:0000166	nucleotide binding	0.00030504	940	478	42
D3	GO:0000166	nucleotide binding	1.59031e-10	940	2443	187
D10	GO:0000166	nucleotide binding	0.0025042	940	1268	89
D13	GO:0000166	nucleotide binding	1.70416e-05	940	280	35
D2	GO:0005634	nucleus	1.37337e-09	1529	478	70
D3	GO:0005634	nucleus	1.47911e-16	1529	2443	274
D4	GO:0005634	nucleus	1.4641e-31	1529	724	149
D6	GO:0005634	nucleus	7.91113e-12	1529	1622	176
D8	GO:0005634	nucleus	0.00681361	1529	950	87
D10	GO:0005634	nucleus	9.88694e-15	1529	1268	163
D11	GO:0005634	nucleus	0.0269505	1529	236	30
D12	GO:0005634	nucleus	0.0140657	1529	117	18
A8	GO:0045735	nutrient reservoir activity	0.0222384	19	297	4
D2	GO:0000808	origin recognition complex	0.0255129	7	478	3
A3	GO:0055114	oxidation-reduction process	9.60775e-10	826	315	38
A6	GO:0055114	oxidation-reduction process	2.65387e-06	826	494	44
D9	GO:0055114	oxidation-reduction process	0.0287613	826	353	27
A3	GO:0016491	oxidoreductase activity	1.97999e-06	486	315	24
A10	GO:0046857	oxidoreductase activity, acting on other nitrogenous compounds as donors, with NAD or NADP as acceptor	0.0107017	2	105	2
A6	GO:0016705	oxidoreductase activity, acting on paired donors, with incorporation or reduction of molecular oxygen	0.0399323	157	494	11
D13	GO:0016616	oxidoreductase activity, acting on the CH-OH group of donors, NAD or NADP as acceptor	0.0202259	64	280	6
A6	GO:0019825	oxygen binding	0.0407476	134	494	10
A3	GO:0009654	oxygen evolving complex	0.0102524	23	315	4
A6	GO:0030599	pectinesterase activity	0.000155812	50	494	9
A6	GO:0046910	pectinesterase inhibitor activity	0.023072	19	494	4
D10	GO:0008233	peptidase activity	2.70764e-06	54	1268	15
A3	GO:0018208	peptidyl-proline modification	0.00732468	20	315	4
A3	GO:0003755	peptidyl-prolyl cis-trans isomerase activity	0.000296568	51	315	7
D8	GO:0007031	peroxisome organization	0.034439	16	950	5
A6	GO:0009698	phenylpropanoid metabolic process	0.0487053	9	494	3
D6	GO:0016791	phosphatase activity	0.0429242	38	1622	9
A4	GO:0015120	phosphoglycerate transmembrane transporter activity	0.0399594	5	91	2
A4	GO:0015713	phosphoglycerate transport	0.0399594	5	91	2
A3	GO:0009853	photorespiration	0.01682	27	315	4
D8	GO:0009853	photorespiration	0.000722117	27	950	8
A3	GO:0015979	photosynthesis	2.11259e-20	107	315	23
A13	GO:0015979	photosynthesis	0.000107725	107	202	9
A8	GO:0009765	photosynthesis, light harvesting	0.0282125	22	297	4
A3	GO:0019684	photosynthesis, light reaction	6.7021e-08	16	315	7
A4	GO:0009643	photosynthetic acclimation	0.0187477	3	91	2
A3	GO:0009767	photosynthetic electron transport chain	1.12017e-07	17	315	7
A3	GO:0009773	photosynthetic electron transport in photosystem I	2.01576e-06	15	315	6
A3	GO:0009772	photosynthetic electron transport in photosystem II	0.01682	10	315	3
A3	GO:0009521	photosystem	0.0140871	2	315	2
A3	GO:0009522	photosystem I	3.03599e-06	17	315	6
A3	GO:0009538	photosystem I reaction center	8.94671e-08	10	315	6
A3	GO:0009523	photosystem II	3.53011e-08	35	315	9
A13	GO:0009523	photosystem II	0.0374602	35	202	4
A3	GO:0010207	photosystem II assembly	0.0423463	14	315	3
A3	GO:0009539	photosystem II reaction center	0.00710182	8	315	3
D1	GO:0009524	phragmoplast	0.00529533	38	126	5
D1	GO:0000914	phragmoplast assembly	0.0150533	6	126	3
D3	GO:0048827	phyllome development	0.00665071	8	2443	6
A6	GO:0009505	plant-type cell wall	0.0294235	177	494	12
A6	GO:0009664	plant-type cell wall organization	0.00399955	31	494	6
A6	GO:0005886	plasma membrane	0.000191965	1463	494	57
D3	GO:0005886	plasma membrane	9.23505e-10	1463	2443	247
D4	GO:0005886	plasma membrane	0.0414725	1463	724	77
D12	GO:0005886	plasma membrane	0.000282104	1463	117	21
D13	GO:0005886	plasma membrane	3.14857e-07	1463	280	48
A6	GO:0009506	plasmodesma	0.023072	676	494	28
A10	GO:0009506	plasmodesma	0.0139368	676	105	12
D2	GO:0009506	plasmodesma	7.44755e-09	676	478	43
D3	GO:0009506	plasmodesma	2.61684e-05	676	2443	126
D12	GO:0009506	plasmodesma	1.08649e-05	676	117	16
D13	GO:0009506	plasmodesma	8.72609e-09	676	280	34
D2	GO:0009508	plastid chromosome	0.00121831	17	478	5
D6	GO:0000311	plastid large ribosomal subunit	0.00109257	13	1622	6
D6	GO:0000312	plastid small ribosomal subunit	0.00622907	12	1622	5
D8	GO:0009532	plastid stroma	0.00785333	18	950	6
A3	GO:0010287	plastoglobule	8.21819e-12	63	315	14
A10	GO:0010287	plastoglobule	0.0398019	63	105	4
A3	GO:0009496	plastoquinol--plastocyanin reductase activity	0.0102593	2	315	2
A3	GO:0008266	poly(U) RNA binding	0.00688565	18	315	4
D2	GO:0030247	polysaccharide binding	0.0209496	9	478	3
A3	GO:0043085	positive regulation of catalytic activity	0.000888056	12	315	4
D6	GO:0009939	positive regulation of gibberellic acid mediated signaling pathway	0.00714805	5	1622	4
D6	GO:0045893	positive regulation of transcription, DNA-dependent	3.11572e-05	119	1622	25
D3	GO:0015450	P-P-bond-hydrolysis-driven protein transmembrane transporter activity	0.0345598	35	2443	9
D3	GO:0016272	prefoldin complex	0.0147103	8	2443	4
A6	GO:0002020	protease binding	0.0330847	7	494	3
D3	GO:0000502	proteasome complex	0.00313146	40	2443	13
D10	GO:0000502	proteasome complex	1.89252e-11	40	1268	18
D10	GO:0005839	proteasome core complex	1.01649e-07	15	1268	9
D10	GO:0019773	proteasome core complex, alpha-subunit complex	0.0114426	8	1268	4
D10	GO:0008541	proteasome regulatory particle, lid subcomplex	0.0104963	11	1268	5
D2	GO:0005515	protein binding	0.0011031	3134	478	97
D3	GO:0005515	protein binding	1.33554e-15	3134	2443	512
D4	GO:0005515	protein binding	8.20507e-21	3134	724	219
D6	GO:0005515	protein binding	1.58305e-31	3134	1622	385
D8	GO:0005515	protein binding	0.00785333	3134	950	158
D10	GO:0005515	protein binding	1.37061e-09	3134	1268	271
D13	GO:0005515	protein binding	0.00451067	3134	280	65
D10	GO:0030163	protein catabolic process	0.00275339	36	1268	10
D13	GO:0043234	protein complex	0.0332266	27	280	4
D6	GO:0006470	protein dephosphorylation	6.80113e-08	61	1622	21
D4	GO:0046983	protein dimerization activity	0.0414725	133	724	12
D6	GO:0046983	protein dimerization activity	0.0376802	133	1622	19
A3	GO:0015035	protein disulfide oxidoreductase activity	0.00210848	73	315	7
D2	GO:0006457	protein folding	5.07247e-05	204	478	17
D3	GO:0006457	protein folding	0.0321139	204	2443	36
D10	GO:0006457	protein folding	0.00172554	204	1268	26
D6	GO:0004672	protein kinase activity	2.68784e-07	768	1622	102
D12	GO:0006479	protein methylation	0.0496991	7	117	2
D12	GO:0008276	protein methyltransferase activity	0.0496991	7	117	2
D6	GO:0006468	protein phosphorylation	1.54989e-07	770	1622	103
D2	GO:0042026	protein refolding	0.0449357	8	478	3
D6	GO:0004674	protein serine/threonine kinase activity	4.51614e-07	676	1622	92
D6	GO:0004722	protein serine/threonine phosphatase activity	0.000237588	109	1622	23
D6	GO:0008287	protein serine/threonine phosphatase complex	0.000973282	32	1622	11
D6	GO:0004712	protein serine/threonine/tyrosine kinase activity	0.0134986	42	1622	11
D3	GO:0015031	protein transport	0.0314637	109	2443	19
D8	GO:0015031	protein transport	0.016461	109	950	13
D13	GO:0008565	protein transporter activity	0.0147031	60	280	6
D6	GO:0004713	protein tyrosine kinase activity	0.000365504	269	1622	42
D8	GO:0006508	proteolysis	0.00170333	284	950	28
D10	GO:0051603	proteolysis involved in cellular protein catabolic process	2.02292e-06	18	1268	9
A6	GO:0015992	proton transport	0.00359898	18	494	5
A13	GO:0045259	proton-transporting ATP synthase complex	0.020651	2	202	2
A6	GO:0046961	proton-transporting ATPase activity, rotational mechanism	0.0407151	21	494	4
A6	GO:0033179	proton-transporting V-type ATPase, V0 domain	0.0226367	8	494	3
D2	GO:0009982	pseudouridine synthase activity	0.0340291	19	478	4
D13	GO:0006166	purine ribonucleoside salvage	0.0318921	3	280	2
A6	GO:0004739	pyruvate dehydrogenase (acetyl-transferring) activity	0.0226367	6	494	3
D6	GO:0010325	raffinose family oligosaccharide biosynthetic process	0.0261848	3	1622	3
A3	GO:0019253	reductive pentose-phosphate cycle	0.00022793	8	315	4
D1	GO:0051726	regulation of cell cycle	0.036467	58	126	4
D2	GO:0051726	regulation of cell cycle	0.000942765	58	478	8
D13	GO:0010482	regulation of epidermal cell division	0.0219257	2	280	2
D13	GO:0010439	regulation of glucosinolate biosynthetic process	0.0333996	3	280	2
D3	GO:0043484	regulation of RNA splicing	0.0494725	5	2443	4
D3	GO:0006355	regulation of transcription, DNA-dependent	0.0101662	982	2443	130
D4	GO:0006355	regulation of transcription, DNA-dependent	3.14616e-18	982	724	87
D6	GO:0006355	regulation of transcription, DNA-dependent	6.32318e-25	982	1622	158
D11	GO:0006355	regulation of transcription, DNA-dependent	5.61878e-07	982	236	32
D8	GO:0045271	respiratory chain complex I	9.75126e-06	18	950	8
A3	GO:0009737	response to abscisic acid stimulus	0.0247178	259	315	11
D6	GO:0009737	response to abscisic acid stimulus	0.00096645	259	1622	37
D6	GO:0009733	response to auxin stimulus	0.00622907	175	1622	25
D10	GO:0009733	response to auxin stimulus	0.0394253	175	1268	20
A8	GO:0009637	response to blue light	0.00171698	28	297	6
A6	GO:0046686	response to cadmium ion	0.00296476	280	494	18
D13	GO:0046686	response to cadmium ion	0.000216902	280	280	16
A3	GO:0010037	response to carbon dioxide	0.0336215	3	315	2
D6	GO:0010200	response to chitin	4.81276e-10	92	1622	28
D11	GO:0010200	response to chitin	1.57706e-05	92	236	10
D2	GO:0010583	response to cyclopentenone	6.16876e-05	26	478	7
D6	GO:0009723	response to ethylene stimulus	0.0195769	81	1622	15
D2	GO:0010332	response to gamma radiation	0.00898682	12	478	4
D6	GO:0009739	response to gibberellin stimulus	0.00015658	63	1622	16
D3	GO:0009408	response to heat	0.0484385	119	2443	24
D10	GO:0009408	response to heat	0.0417324	119	1268	16
D6	GO:0009753	response to jasmonic acid stimulus	0.0376802	97	1622	16
D11	GO:0009612	response to mechanical stimulus	0.0113166	7	236	3
D6	GO:0009751	response to salicylic acid stimulus	0.00300882	86	1622	17
A6	GO:0009651	response to salt stress	0.0226367	319	494	17
D6	GO:0009651	response to salt stress	0.00593785	319	1622	40
D13	GO:0009651	response to salt stress	0.00465315	319	280	14
A6	GO:0009411	response to UV	0.0443957	20	494	4
D6	GO:0009414	response to water deprivation	9.12763e-06	154	1622	30
A6	GO:0009611	response to wounding	0.0403074	117	494	9
D6	GO:0009611	response to wounding	0.0235749	117	1622	19
A6	GO:0010043	response to zinc ion	0.0244347	30	494	5
D2	GO:0030529	ribonucleoprotein complex	0.00125228	9	478	4
D12	GO:0000028	ribosomal small subunit assembly	0.00922996	3	117	2
D2	GO:0005840	ribosome	2.66684e-42	283	478	54
D3	GO:0005840	ribosome	0.00313146	283	2443	33
D10	GO:0005840	ribosome	2.72002e-10	283	1268	36
D12	GO:0005840	ribosome	9.79139e-32	283	117	31
D13	GO:0005840	ribosome	0.00193819	283	280	11
D2	GO:0042254	ribosome biogenesis	2.25148e-23	96	478	26
D3	GO:0042254	ribosome biogenesis	0.0101662	96	2443	16
D12	GO:0042254	ribosome biogenesis	6.20215e-17	96	117	15
D13	GO:0042254	ribosome biogenesis	0.0131227	96	280	6
D2	GO:0003723	RNA binding	3.13898e-10	418	478	34
D3	GO:0003723	RNA binding	6.11984e-15	418	2443	103
D10	GO:0003723	RNA binding	1.05233e-08	418	1268	57
D12	GO:0003723	RNA binding	0.000524626	418	117	11
D13	GO:0003723	RNA binding	0.0010866	418	280	18
D12	GO:0001510	RNA methylation	0.0259386	5	117	2
D10	GO:0006396	RNA processing	0.000183848	69	1268	17
D3	GO:0008380	RNA splicing	0.00199692	40	2443	15
D10	GO:0008380	RNA splicing	0.00673183	40	1268	10
D4	GO:0048364	root development	0.0251787	83	724	12
D12	GO:0006407	rRNA export from nucleus	0.00922996	3	117	2
D2	GO:0006364	rRNA processing	0.0011031	39	478	7
D12	GO:0006364	rRNA processing	0.00526707	39	117	4
D4	GO:0043565	sequence-specific DNA binding	0.00112191	221	724	20
D6	GO:0043565	sequence-specific DNA binding	3.03102e-07	221	1622	40
D4	GO:0003700	sequence-specific DNA binding transcription factor activity	1.76814e-14	950	724	76
D6	GO:0003700	sequence-specific DNA binding transcription factor activity	4.30557e-26	950	1622	157
D11	GO:0003700	sequence-specific DNA binding transcription factor activity	1.0303e-07	950	236	33
D6	GO:0004871	signal transducer activity	0.00254583	78	1622	17
D3	GO:0008180	signalosome	0.0321139	13	2443	6
D2	GO:0005732	small nucleolar ribonucleoprotein complex	0.00999742	20	478	4
D10	GO:0005732	small nucleolar ribonucleoprotein complex	0.00104625	20	1268	6
D2	GO:0015935	small ribosomal subunit	0.00784442	33	478	5
D12	GO:0015935	small ribosomal subunit	0.00291229	33	117	4
A3	GO:0010319	stromule	0.00641573	34	315	5
A6	GO:0005199	structural constituent of cell wall	0.000820164	21	494	6
D13	GO:0005200	structural constituent of cytoskeleton	0.0202259	22	280	4
D2	GO:0003735	structural constituent of ribosome	3.97382e-45	291	478	57
D3	GO:0003735	structural constituent of ribosome	0.00868794	291	2443	32
D10	GO:0003735	structural constituent of ribosome	2.74333e-11	291	1268	38
D12	GO:0003735	structural constituent of ribosome	1.22468e-32	291	117	32
D13	GO:0003735	structural constituent of ribosome	0.00200699	291	280	11
D3	GO:0005198	structural molecule activity	0.009058	57	2443	16
D13	GO:0005198	structural molecule activity	0.00863953	57	280	6
A10	GO:0005986	sucrose biosynthetic process	0.0216029	17	105	3
D6	GO:0005351	sugar:hydrogen symporter activity	0.00898036	68	1622	15
A6	GO:0015116	sulfate transmembrane transporter activity	0.0142949	12	494	4
D13	GO:0042964	thioredoxin biosynthetic process	0.0202259	2	280	2
D13	GO:0004791	thioredoxin-disulfide reductase activity	0.0454343	3	280	2
D10	GO:0004298	threonine-type endopeptidase activity	2.61478e-07	16	1268	9
A3	GO:0009579	thylakoid	4.26644e-30	192	315	36
A4	GO:0009579	thylakoid	3.47737e-05	192	91	9
A6	GO:0009579	thylakoid	0.0226367	192	494	12
A10	GO:0009579	thylakoid	0.00652726	192	105	7
A13	GO:0009579	thylakoid	2.07244e-08	192	202	15
A3	GO:0031977	thylakoid lumen	0.000257667	49	315	7
A10	GO:0031977	thylakoid lumen	0.00159189	49	105	5
A3	GO:0042651	thylakoid membrane	0.000307936	19	315	5
A3	GO:0010027	thylakoid membrane organization	0.00914862	20	315	4
D3	GO:0006351	transcription, DNA-dependent	0.000331017	67	2443	22
D4	GO:0006351	transcription, DNA-dependent	0.0371224	67	724	10
A6	GO:0016757	transferase activity, transferring glycosyl groups	0.0487053	247	494	14
D6	GO:0016772	transferase activity, transferring phosphorus-containing groups	8.56903e-08	812	1622	108
A3	GO:0004802	transketolase activity	0.0358774	3	315	2
D2	GO:0006412	translation	1.28694e-43	304	478	57
D3	GO:0006412	translation	0.000308524	304	2443	39
D10	GO:0006412	translation	1.49067e-12	304	1268	42
D12	GO:0006412	translation	6.3939e-31	304	117	31
D13	GO:0006412	translation	0.0039136	304	280	11
D3	GO:0003743	translation initiation factor activity	1.60823e-07	63	2443	25
D12	GO:0003743	translation initiation factor activity	0.0230889	63	117	4
D3	GO:0006413	translational initiation	1.49229e-07	49	2443	21
A6	GO:0055085	transmembrane transport	0.0330847	405	494	20
D6	GO:0055085	transmembrane transport	0.00198988	405	1622	53
D6	GO:0022857	transmembrane transporter activity	0.0429242	64	1622	13
A6	GO:0005215	transporter activity	0.02171	325	494	18
D6	GO:0005992	trehalose biosynthetic process	0.0429242	22	1622	7
D6	GO:0004805	trehalose-phosphatase activity	0.0125651	13	1622	6
A4	GO:0035436	triose phosphate transmembrane transport	0.0280363	4	91	2
A4	GO:0071917	triose-phosphate transmembrane transporter activity	0.0280363	4	91	2
D8	GO:0006388	tRNA splicing, via endonucleolytic cleavage and ligation	0.0331172	4	950	3
A6	GO:0006569	tryptophan catabolic process	0.0385687	2	494	2
D13	GO:0045298	tubulin complex	0.0223054	9	280	3
D3	GO:0004221	ubiquitin thiolesterase activity	0.0236199	33	2443	13
D3	GO:0006511	ubiquitin-dependent protein catabolic process	0.000924397	155	2443	36
D10	GO:0006511	ubiquitin-dependent protein catabolic process	0.0114426	155	1268	21
D6	GO:0004842	ubiquitin-protein ligase activity	3.11572e-05	204	1622	35
D3	GO:0004843	ubiquitin-specific protease activity	0.0107118	20	2443	10
D12	GO:0052691	UDP-arabinopyranose mutase activity	0.00431547	2	117	2
D12	GO:0033356	UDP-L-arabinose metabolic process	0.00922996	3	117	2
D2	GO:0051082	unfolded protein binding	0.037854	99	478	8
A6	GO:0005774	vacuolar membrane	0.0240155	360	494	18
D2	GO:0005774	vacuolar membrane	1.65281e-05	360	478	24
D3	GO:0005774	vacuolar membrane	0.0258884	360	2443	58
D12	GO:0005774	vacuolar membrane	0.00092202	360	117	10
D13	GO:0005774	vacuolar membrane	0.000524889	360	280	17
A6	GO:0005773	vacuole	3.10878e-05	424	494	27
A8	GO:0005773	vacuole	0.0394271	424	297	15
A10	GO:0005773	vacuole	0.0229086	424	105	9
D13	GO:0005773	vacuole	0.0420173	424	280	14
D3	GO:0010228	vegetative to reproductive phase transition of meristem	3.74325e-06	49	2443	22
D3	GO:0016192	vesicle-mediated transport	0.00711548	115	2443	27
D8	GO:0016192	vesicle-mediated transport	0.0436517	115	950	13
D11	GO:0016762	xyloglucan:xyloglucosyl transferase activity	0.0113166	19	236	4
D3	GO:0008270	zinc ion binding	9.32345e-07	990	2443	166
D6	GO:0008270	zinc ion binding	4.18462e-18	990	1622	147

## Sheet: leaf dev in all_D
GO:0048366	leaf development
P(over-represented)	1.83102e-06
Number of genes	83
Number up-regulated	55
ACCESSION	ANNOTATION							B	M	T	Mat	Cluster
AT1G04020	BARD1 (BREAST CANCER ASSOCIATED RING 1); DNA binding / transcription coactivator							624.05	189.524	117.55	53.9952	D1	Encodes a protein containing two tandem BRCA1 C-Terminal (BRCT) domains, which function in phosphorylation-dependent protein–protein interactions.Loss of function mutations cause defects in meristem organization due to failure to repress WUS. BARD1 binds to WUS promoter and over expression of BARD reduces the extent of WUS expression.
AT5G28640	AN3 (ANGUSTIFOLIA 3); protein binding / transcription coactivator							1007.43	236.824	189.852	114.862	D10	Encodes a protein with similarity to mammalian transcriptional coactivator that is involved in cell proliferation during leaf and flower development. Loss of function mutations have narrow, pointed leaves and narrow floral organs. AN3 interacts with members of the growth regulating factor (GRF) family of transcription factors.
AT5G53290	CRF3 (CYTOKININ RESPONSE FACTOR 3); DNA binding / transcription factor							41.7587	18.3321	7.53506	0.683882	D10	encodes a member of the ERF (ethylene response factor) subfamily B-5 of ERF/AP2 transcription factor family. The protein contains one AP2 domain. There are 7 members in this subfamily.
AT3G61630	CRF6 (CYTOKININ RESPONSE FACTOR 6); DNA binding / transcription factor							92.9756	48.9555	47.7779	24.0262	D10	CRF6 encodes one of the six cytokinin response factors. CRF5 belongs to the AP2/ERF superfamily of the transcriptional factors. CRF proteins rapidly relocalize to the nucleus in response to cytokinin. Analysis of loos-of-function mutants revealed that the CRFs function redundantly to regulate the development of embryos, cotyledons and leaves.
AT4G18750	DOT4 (DEFECTIVELY ORGANIZED TRIBUTARIES 4)							226.567	97.9943	65.9731	29.1791	D10	Encodes a pentatricopeptide (PPR) protein involved in leaf and root development. dot4 mutants have an aberrant midgap venation pattern in juvenile leaves and cotyledons.
AT1G13870	DRL1 (DEFORMED ROOTS AND LEAVES 1); calmodulin binding / purine nucleotide binding							775.827	637.051	634.466	472.8	D10	Encodes a homolog of the yeast TOT4/KTI12 protein. Yeast TOT4/KTI12 associates with Elongator, a multisubunit complex that binds the RNA polymerase II transcription elongation complex. Ds insertion mutant has enlarged shoot apical region, 4 to 6 long slender leaves followed by spike-like structures, short roots.
AT4G00850	GIF3 (GRF1-INTERACTING FACTOR 3); protein binding / transcription coactivator							894.943	507.016	437.35	357.187	D10	Arabidopsis thaliana GRF1-interacting factor 3 (GIF3) mRNA
AT5G56030	HSP81-2 (HEAT SHOCK PROTEIN 81-2); ATP binding							24784.1	20756.4	20531.2	18288.9	D10	A member of heat shock protein 90 (HSP90) gene family. Expressed in all tissues and abundant in root apical meristem, pollen and tapetum. Expression is NOT heat-induced but induced by IAA and NaCl. Interacts with HsfA1d in the cytosol and the nucleus and negatively regulates HsfA1d. Did not bind to AtHsfA4c.
AT2G37860	LCD1 (LOWER CELL DENSITY 1)							315.204	166.747	142.787	110.069	D10	Encodes a protein of unknown function. Mutants have pale leaves, lower cell density in the palisade parenchyma and increased sensitivity to ozone and virulent Pseudomonas syringae
AT5G58230	MSI1 (MULTICOPY SUPRESSOR OF IRA1); protein binding							1652.62	965.194	979.268	757.174	D10	Encodes a WD-40 repeat containing protein that functions in chromatin assembly as part of the CAF1 and FIE complex. Mutants exhibit parthenogenetic development that includes proliferation of unfertilized endosperm and embryos. In heterozygous plants 50% of embryos abort. Of the aborted embryos the early aborted class are homozygous and the later aborting lass are heterozygotes in which the defect…
AT5G20730	NPH4 (NON-PHOTOTROPHIC HYPOCOTYL); DNA binding / transcription activator/ transcription factor/ transcription regulator							6483.12	5091.68	4934.89	3838.97	D10	Encodes an auxin-regulated transcriptional activator. Activates expression of IAA1 and IAA9 in the presence of auxin. Mutants affect blue light and gravitropic and auxin mediated growth responses. Together with AUX19, it is involved in the response to ethylene. In the arf7 arf19 double mutant, several auxin-responsive genes (e.g. IAA5, LBD16, LBD29 and LBD33) are no longer upregulated by auxin.
AT4G38630	RPN10 (REGULATORY PARTICLE NON-ATPASE 10); peptide receptor							1369.16	1071.07	1162.43	877.083	D10	Regulatory particle non-ATPase subunit of the 26S proteasome with multiubiquitin-chain-binding capabilities
AT2G42200	SPL9 (SQUAMOSA PROMOTER BINDING PROTEIN-LIKE 9); transcription factor							94.0982	54.2	36.1859	20.9028	D10	Encodes a putative transcriptional regulator that is involved in the vegetative to reproductive phase transition. Expression is regulated by MIR156b. SPL activity nonautonomously inhibits initiation of new leaves at the shoot apical meristem.
AT4G07410	transducin family protein / WD-40 repeat family protein							634.316	321.388	308.439	245.611	D10	0
AT4G11140	CRF1 (CYTOKININ RESPONSE FACTOR 1); DNA binding / transcription factor							141.398	108.577	104.006	18.9145	D11	encodes a member of the ERF (ethylene response factor) subfamily B-5 of ERF/AP2 transcription factor family. The protein contains one AP2 domain. There are 7 members in this subfamily. Also named as CRF1 (cytokinin response factor 1).
AT5G45190	cyclin family protein							1302.51	1148.05	1311.88	820.52	D11	Encodes a cyclin T partner CYCT1;5. Plays important roles in infection with Cauliflower mosaic virus (CaMV).
AT2G40300	ATFER4 (ferritin 4); binding / ferric iron binding / oxidoreductase/ transition metal ion binding							1326.44	1092.34	1014.84	1635.63	D13	Encodes FERRITIN 4, AtFER4. Ferritins are a class of 24-mer multi-meric proteins found in all kingdoms of life. Function as the main iron store in mammals. Evidence suggests that Arabidopsis ferritins are essential to protect cells against oxidative damage, but they do not constitute the major iron pool. Localize to mitochondria. Knock out mutants are not sensitive to abiotic stress.
AT1G30210	TCP24 (TEOSINTE BRANCHED1, CYCLOIDEA, AND PCF FAMILY 24); transcription factor							585.667	387.678	516.306	645.819	D13	TCP family protein involved in heterochronic regulation of leaf differentiation.
AT3G15030	TCP4 (TCP family transcription factor 4); transcription factor							1350.02	978.403	850.595	1278.1	D13	Arabidopsis thaliana TCP family transcription factor. Regulated by miR319. Involved in heterchronic regulation of leaf differentiation.
AT5G64630	FAS2 (FASCIATA 2); nucleotide binding / protein binding							405.338	136.138	55.8418	76.6979	D2	Chromatin Assembly Factor-1 (CAF-1) p60 subunit. Involved in organization of the shoot and root apical meristems. In Arabidopsis, the three CAF-1 subunits are encoded by FAS1, FAS2 and, most likely, MSI1, respectively. Mutations in FAS1 or FAS2 lead to increased frequency of homologous recombination and T-DNA integration in Arabidopsis.
AT5G05620	GCP2 (GAMMA-TUBULIN COMPLEX PROTEIN 2); GTP binding / GTPase/ structural molecule							906.954	361.934	256.568	221.843	D2	Paralog of TUBG1, required for centrosomal and noncentrosomal microtubule nucleation. Involved in specification of cell identity, such as stomatal patterning. Constitutively expressed throughout plant.
AT4G30340	ATDGK7 (Diacylglycerol kinase 7); diacylglycerol kinase							188.497	123.366	148.186	104.786	D3	encodes a diacylglycerol kinase. Applying a specific diacylglycerol kinase inhibitor to the growth media resulted in reduced root elongation and plant growth. Gene is expressed throughout the plant but is strongest in flowers and young seedlings.
AT3G13960	AtGRF5 (GROWTH-REGULATING FACTOR 5); transcription activator							32.7927	2.90875	2.37077	0	D3	Growth regulating factor encoding transcription activator. One of the nine members of a GRF gene family, containing nuclear targeting domain. Involved in leaf development and expressed in root, shoot and flower.
AT1G48920	ATNUC-L1; nucleic acid binding / nucleotide binding							558.426	134.156	78.0982	100.278	D3	Encodes ATNUC-L1 (NUCLEOLIN LIKE 1), the predominant form of the two nucleolin proteins found in Arabidopsis. This protein is involved in rRNA processing, ribosome biosynthesis, and vascular pattern formation. PARL1 localizes to the nucleolus and parl1 mutants accumulate elevated levels of the unspliced 35S pre-rRNA. parl1 mutants also have defects in cotyledon, leaf, sepal, and petal vein patter…
AT5G64960	CDKC2 (Cyclin dependent kinase group C 2); kinase							330.734	254.954	286.732	235.57	D3	Encodes CDKC;2, part of a CDKC kinase complex that is targeted by Cauliflower mosaic virus (CaMV) for transcriptional activation of viral genes. Also regulates plant growth and development. Co-localizes with spliceosomal components in a manner dependent on the transcriptional status of the cells and on CDKC2-kinase activity. Expression of CDKC2 modifies the location of spliceosomal components.
AT4G31160	DCAF1 (DDB1-CUL4 ASSOCIATED FACTOR 1); nucleotide binding							1323.24	807.133	896.924	854.44	D3	Encodes a DCAF/DWD protein capable of interacting with DDB1 and associating with CUL4, likely as part of a nuclear ubiquitin ligase complex. DCAF1 appears to be required for plant embryogenesis and to affect several other developmental processes including leaf, shoot, and flower development.
AT3G07610	IBM1 (increase in bonsai methylation 1); histone demethylase(H3-K9 specific) / transcription factor							1158.06	690.55	773.581	701.379	D3	IBM1 likely encodes a protein with histone H3mK9 demethylation activity. It may preferentially demethylate H3mK9 at low-copy loci to protect them from silencing by nearby heterochromatin by preventing the spread of cytosine methylation. BONSAI (At1g73177) is hypermethylated in ibm1 mutants. ibm1 mutants have morphological defects that become apparent at the F3 generation, including small narrow l…
AT3G22990	LFR (LEAF AND FLOWER RELATED); binding							613.028	463.331	556.925	415.637	D3	Armadillo-repeat containing protein. Involved in leaf and flower development. Located in nucleus. Broadly expressed throughout vegetative and floral tissues.
AT3G49500	RDR6 (RNA-DEPENDENT RNA POLYMERASE 6); RNA-directed RNA polymerase/ nucleic acid binding							140.808	96.9494	122.097	109.114	D3	Encodes RNA-dependent RNA polymerase. Involved in trans-acting siRNA and other siRNA biogenesis. Required for post-transcriptional gene silencing and natural virus resistance.
AT1G64520	RPN12a (Regulatory Particle non-ATPase 12a); peptidase							1148.34	881.509	846.173	735.578	D3	0
AT2G22840	AtGRF1 (GROWTH-REGULATING FACTOR 1); transcription activator							503.754	256.694	242.54	59.2761	D4	Growth regulating factor encoding transcription activator. One of the nine members of a GRF gene family, containing nuclear targeting domain. Mutants result in smaller leaves indicating the role of the gene in leaf development. Expressed in root, shoot and flower
AT4G37740	AtGRF2 (GROWTHREGULATING FACTOR 2); transcription activator							829.816	173.064	117.18	19.475	D4	Growth regulating factor encoding transcription activator. One of the nine members of a GRF gene family, containing nuclear targeting domain. Mutants result in smaller leaves indicating the role of the gene in leaf development. Expressed in root, shoot and flower
AT2G36400	AtGRF3 (GROWTH-REGULATING FACTOR 3); transcription activator							303.248	60.1716	24.1747	2.49491	D4	Growth regulating factor encoding transcription activator. One of the nine members of a GRF gene family, containing nuclear targeting domain. Mutants result in smaller leaves indicating the role of the gene in leaf development. Expressed in root, shoot and flower.
AT2G06200	AtGRF6 (GROWTH-REGULATING FACTOR 6); transcription activator							103.387	72.544	73.5849	31.1167	D4	Growth regulating factor encoding transcription activator. One of the nine members of a GRF gene family, containing nuclear targeting domain. Involved in leaf development and expressed in root, shoot and flower
AT4G24150	AtGRF8 (GROWTH-REGULATING FACTOR 8); transcription activator							129.197	40.3671	40.4879	6.12485	D4	Growth regulating factor encoding transcription activator. One of the nine members of a GRF gene family, containing nuclear targeting domain. Involved in leaf development and expressed in shoot and flower.
AT2G45480	AtGRF9 (GROWTH-REGULATING FACTOR 9); transcription activator							360.21	100.65	67.9711	16.7298	D4	Growth regulating factor encoding transcription activator. One of the nine members of a GRF gene family, containing nuclear targeting domain. Involved in leaf development.
AT5G16780	DOT2 (DEFECTIVELY ORGANIZED TRIBUTARIES 2)							1113.02	884.233	1140.72	727.545	D4	Encodes a protein belonging to SART-1 family. The gene is expressed in the basal region of the developing embryo during heart stage. Phenotypic analyses of dot2 mutants suggest that this protein plays a role in root, shoot, and flower development. dot2 mutants are dwarved plants that display an aberrant spurred leaf venation pattern and fail to flower. In the roots DOT2 appears to be require for …
AT1G65470	FAS1 (FASCIATA 1); histone binding							1892.64	1100.32	1261.86	789.486	D4	Chromatin Assembly Factor-1 (CAF-1) p150 subunit. Mutants have reduced heterochromatin content. In Arabidopsis, the three CAF-1 subunits are encoded by FAS1, FAS2 and, most likely, MSI1, respectively. Mutations in FAS1 or FAS2 lead to increased frequency of homologous recombination and T-DNA integration in Arabidopsis.
AT3G47450	NOA1 (NO ASSOCIATED 1); GTPase/ nitric-oxide synthase							1127.5	776.12	889.998	467.174	D4	Encodes a protein with similarity to the bacterial YqeH GTPase required for proper ribosome assembly. In Arabidopsis, mutant analyses show that this protein regulates growth and hormonal signaling in plants. It also attenuates oxidative stress and reactive oxygen species (ROS). It also seems to be involved in regulating leaf senescence and cell death. This gene product is also involved in nitric …
AT4G33950	OST1 (OPEN STOMATA 1); calcium-dependent protein serine/threonine kinase/ kinase/ protein kinase							577.925	421.117	497.067	267.847	D4	Encodes calcium-independent ABA-activated protein kinase, a member of SNF1-related protein kinases (SnRK2) whose activity is activated by ionic (salt) and non-ionic (mannitol) osmotic stress. Mutations disrupted ABA induction of stomatal closure as well as ABA inhibition of light-induced stomatal opening. However, regulation of stomatal opening/closing by light or CO(2) is not affected in these m…
AT4G14720	PPD2; dioxygenase/ metal ion binding							606.894	379.799	493.044	202.788	D4	PPD2 (and its paralog, PPD1) encode plant-specific putative DNA-binding proteins. Deletion of the PPD locus increases leaf lamina size and results in dome-shaped rather than flat leaves. Siliques are also altered in shape because of extra lamina growth.
AT3G12280	RBR1 (RETINOBLASTOMA-RELATED 1); transcription factor binding							1641.62	797.791	735.55	432.023	D4	Encodes a retinoblastoma homologue RETINOBLASTOMA-RELATED protein (RBR or RBR1). RBR controls nuclear proliferation in the female gametophyte. Also required for correct differentiation of male gametophytic cell types. Regulates stem cell maintenance in Arabidopsis roots. Involved in the determination of cell cycle arrest in G1 phase after sucrose starvation. RBR1 is also involved in regulation of…
AT3G48430	REF6 (RELATIVE OF EARLY FLOWERING 6); nucleic acid binding / transcription factor/ zinc ion binding							1253.76	754.834	725.779	452.78	D4	Relative of Early Flowering 6 (REF6) encodes a Jumonji N/C and zinc finger domain-containing protein that acts as a positive regulator of flowering in an FLC-dependent pathway. REF6 mutants have hyperacetylation of histone H4 at the FLC locus. REF6 interacts with BES1 in a Y2H assay and in vitro. REF6 may play a role in brassinoteroid signaling by affecting histone methylation in the promoters of…
AT1G17110	UBP15 (UBIQUITIN-SPECIFIC PROTEASE 15); ubiquitin-specific protease							1434.27	1101.72	1288.81	853.549	D4	Encodes a ubiquitin-specific protease, and its activity has been confirmed in an in vitro assay. ubp15 mutants have defects in cell proliferation, and the associated processes of leaf, root, stem, flower, and silique development. UBP15 can be found in the nucleus and cytoplasm in transient assays. Though UBP15 is expressed in many tissues, UBP15 transcript levels are higher in rosette leaves and …
AT1G65650	UCH2; ubiquitin thiolesterase/ ubiquitin-specific protease							782.487	600.773	993.862	504.912	D4	0
AT3G50660	DWF4 (DWARF 4); steroid 22-alpha hydroxylase							188.234	259.212	375.866	175.796	D6	Encodes a 22&#945; hydroxylase whose reaction is a rate-limiting step in brassinosteroid biosynthetic pathway. The protein is a member of CYP90B gene family. CLM is an epi-allele with small, compressed rosette, reduced internode length, and reduced fertility, appears in selfed ddm mutant plants possibly due to loss of cytosine methylation. Transcripts accumulate in actively growing tissues, and G…
AT1G01030	NGA3 (NGATHA3); transcription factor							301.388	342.033	498.431	244.728	D6	0
AT1G14280	PKS2 (PHYTOCHROME KINASE SUBSTRATE 2)							192.422	286.731	443.257	260.129	D6	Encodes phytochrome kinase substrate 2. PKS proteins are critical for hypocotyl phototropism. Forms a complex with Phot1, Phot2 and NPH3.
AT1G13260	RAV1; DNA binding / transcription factor/ transcription repressor							1754.9	2320.23	3171.33	812.02	D6	Encodes an AP2/B3 domain transcription factor which is upregulated in response to low temperature. It contains a B3 DNA binding domain. It has circadian regulation and may function as a negative growth regulator.
AT1G19220	ARF19 (AUXIN RESPONSE FACTOR 19); DNA binding / transcription factor							285.663	247.544	261.636	255.149	D8	Encodes an auxin response factor that contains the conserved VP1-B3 DNA-binding domain at its N-terminus and the Aux/IAA-like domains III and IV present in most ARFs at its C-terminus. The protein interacts with IAA1 (yeast two hybrid) and other auxin response elements such as ER7 and ER9 (yeast one hybrid). ARF19 protein can complement many aspects of the arf7 mutant phenotype and , together wit…
AT5G53660	AtGRF7 (GROWTH-REGULATING FACTOR 7); transcription activator							45.613	27.1671	23.778	6.40985	D8	Growth regulating factor encoding transcription activator. One of the nine members of a GRF gene family, containing nuclear targeting domain. Involved in leaf development and expressed in shoot and flower.
AT4G37650	SHR (SHORT ROOT); protein binding / sequence-specific DNA binding / transcription factor							1461.56	1402.31	1343.16	950.619	D8	Involved in radial organization of the root and shoot axial organs. Essential for normal shoot gravitropism. The protein moves in a highly specific manner from the cells of the stele in which it is synthesized outward. Movement requires sequences within the GRAS and VHIID domains.
AT1G10670	ACLA-1; ATP citrate synthase							1687.69	1494.36	1414.37	1264.22	D8	One of the three genes encoding subunit A of the trimeric protein ATP Citrate Lyase. Antisense ACLA-1 plants cause a reduction in cytosolic acetyl-CoA metabolism and have upregulation of stress-related genes and down-regulation of primary metabolism and growth genes, suggesting the mutation restricts normal growth and developmental processes and puts the plant into a state of stress.
AT4G19600	CYCT1;4; cyclin-dependent protein kinase							5.46192	10.8041	5.57599	0	D9	Encodes a cyclin T partner CYCT1;4. Plays important roles in infection with Cauliflower mosaic virus (CaMV).
AT3G21640	TWD1 (TWISTED DWARF 1); FK506 binding / calmodulin binding / peptidyl-prolyl cis-trans isomerase							1379.2	1593.52	2159.68	427.459	D9	encodes a 42 kDa FK506-binding protein (AtFKBP42) that possesses similarity to multidomain peptidyl-prolyl cis/trans isomerases (PPIases, EC 5.2.1.8), which are known to be components of mammalian steroid hormone receptor complexes. The protein appears to be localized to the plasma membrane by electron microscopy and binds to HSP90.1 and calmodulin in vitro. It also aggregates citrate synthase in…

## Sheet: leaf morpho in all_D
GO:0009965	leaf morphogenesis
P(over-represented)	0.00197382
Number of genes	45
Number up-regulated	30
ACCESSION	ANNOTATION							B	M	T	Mat	Cluster
AT5G67100	ICU2 (INCURVATA2); DNA-directed DNA polymerase							1948.42	595.797	303.323	175.19	D1	Encodes the putative catalytic subunit of the DNA polymerase alpha. Interacts with genes involved in chromatin-mediated cellular memory. ICU2 genetically interacts with TERMINAL FLOWER2, the ortholog of HETEROCHROMATIN PROTEIN1 of animals and yeasts, and with the Polycomb group (PcG) gene CURLY LEAF. A number of regulatory genes were derepressed in the icu2-1 mutant, including genes associated wi…
AT1G52150	ATHB-15; DNA binding / transcription factor							905.762	436.67	428.922	337.981	D10	Member of the class III HD-ZIP protein family. Contains homeodomain and leucine zipper domain. Critical for vascular development and negatively regulates vascular cell differentiation.
AT4G18710	BIN2 (BRASSINOSTEROID-INSENSITIVE 2); glycogen synthase kinase 3/ kinase/ protein kinase							1088.2	671.882	755.959	541.622	D10	ATSK (shaggy-like kinase) family member that encodes an AtSK protein involved in the cross-talk between auxin and brassinosteroid signaling pathways. BR-INSENSITIVE 2 mutant indicated that the BR-insensitive dwarf phenotype was due to a semidominant mutation in the BIN2. BIN2 is not allelic to BRI1. BIN2-mediated phosphorylation appears to promote BZR1 export from the nucleus.
AT5G03790	HB51; DNA binding / sequence-specific DNA binding / transcription factor							66.1455	20.0871	31.1856	2.93817	D10	Encodes a homeodomain leucine zipper class I (HD-Zip I) meristem identity regulator that acts together with LFY to induce CAL expression. It binds to the CAL promoter proximal CAATNATTG element. LMI1 acts primarily downstream of LFY in meristem identity regulation. The interaction between LFY, LMI1 and CAL resembles a feed-forward loop transcriptional network motif. The gene also had additional L…
AT1G68480	JAG (JAGGED); nucleic acid binding / transcription factor/ zinc ion binding							81.7806	14.8871	7.55211	0.725053	D10	Encodes a putative zinc finger transcription factor that is necessary for proper lateral organ shape and is sufficient to induce the proliferation of lateral organ tissue. Together with NUB, it is involved in stamen and carpel development.
AT3G25520	ATL5 (A. THALIANA RIBOSOMAL PROTEIN L5); 5S rRNA binding / structural constituent of ribosome							1673.13	895.899	676.631	959.095	D12	Encodes ribosomal protein L5 that binds to 5S ribosomal RNA and in involved in its export from the nucleus to the cytoplasm. Identified in a screen for enhancers of as1. as1/pgy double mutants show defects in leaf vascular patterning and adaxial cell fate. Double mutant analysis indicates pgy genes function in the same pathway as REV, KAN1 and KAN2.
AT1G01510	AN (ANGUSTIFOLIA); protein binding							869.601	684.737	694.975	932.379	D13	Encodes a homolog of human CtBP. Mutant has longer and thicker leaves than wild type. Involved in controlling polar cell expansion in the leaf width direction.
AT4G03550	ATGSL05 (GLUCAN SYNTHASE-LIKE 5); 1,3-beta-glucan synthase/ transferase, transferring glycosyl groups							253.403	121.966	102.983	166.606	D13	Encodes a callose synthase that is required for wound and papillary callose formation in response to fungal pathogens Erysiphe and Blumeria. Mutants are resistant to P. parasitica and exhibit an exaggerated PR1 response.Contributes to PAMP-induced basal defense.
AT1G30210	TCP24 (TEOSINTE BRANCHED1, CYCLOIDEA, AND PCF FAMILY 24); transcription factor							585.667	387.678	516.306	645.819	D13	TCP family protein involved in heterochronic regulation of leaf differentiation.
AT3G15030	TCP4 (TCP family transcription factor 4); transcription factor							1350.02	978.403	850.595	1278.1	D13	Arabidopsis thaliana TCP family transcription factor. Regulated by miR319. Involved in heterchronic regulation of leaf differentiation.
AT5G39740	60S ribosomal protein L5 (RPL5B)							23990.8	15666.1	11644.2	11915.8	D2	Encodes a ribosomal protein RPL5B that is involved in ribosome biogenesis and plays a role in organ size control by promoting cell proliferation and preventing compensation in normal leaf development.
AT5G55920	nucleolar protein, putative							1610.73	743.708	592.809	707.24	D2	Encodes a homolog of the S. cerevisiae Nop2 that is involved in ribosome biogenesis and plays a role on organ size control by promoting cell proliferation and preventing compensation in normal leaf development.
AT2G48120	PAC (PALE CRESS)							839.323	439.755	288.539	317.993	D2	The pale cress (pac) mutant affects chloroplast and leaf development; mutants are ABA-deficient and accumulate lower levels of carotenoids and chlorophyll compared to wild type. PAC is probably involved in chloroplast mRNA maturation. Three alternative transcripts of this gene exist.
AT5G13680	ABO1 (ABA-OVERLY SENSITIVE 1); transcription elongation regulator							511.23	210.464	160.623	182.171	D3	A subunit of Elongator, a histone acetyl transferase complex, consisting of six subunits (ELP1–ELP6), that copurifies with the elongating RNAPII in yeast and humans. Three Arabidopsis thaliana genes, encoding homologs of the yeast Elongator subunits ELP1, ELP3 (histone acetyl transferase), and ELP4 are responsible for the narrow leaf phenotype in elongata mutants and for reduced root growth that …
AT2G37630	AS1 (ASYMMETRIC LEAVES 1); DNA binding / protein homodimerization/ transcription factor							995.046	824.691	828.714	936.188	D3	Encodes a MYB-domain protein involved in specification of the leaf proximodistal axis. Mutation results in lobed and dissected leaves with a characteristic asymmetry. Homologous to the Antirrhinum PHANTASTICA (PHAN) and maize ROUGH SHEATH2 (RS2) genes Asymmetric placement of auxin response at the distal leaf tip precedes visible asymmetric leaf growth. Acts alongside AXR1 to exclude BP expression…
AT4G34740	ATASE2 (GLN PHOSPHORIBOSYL PYROPHOSPHATE AMIDOTRANSFERASE 2); amidophosphoribosyltransferase							552.474	406.303	451.023	544.674	D3	Encodes glutamine 5-phosphoribosylpyrophosphate amidotransferase. Mutants are deficient in leaf, but not cotyledon, plastid and palisade cell development. Mutants exhibit defective chloroplast development under non-low light, suggesting that the defect in chloroplast development is caused by photo-oxidative damage.
AT1G69780	ATHB13; DNA binding / sequence-specific DNA binding / transcription factor							206.23	35.8481	77.0017	45.7664	D3	Encodes a homeodomain leucine zipper class I (HD-Zip I) protein.
AT2G23380	CLF (CURLY LEAF); transcription factor							895.809	640.19	757.584	546.023	D3	Similar to the product of the Polycomb-group gene Enhancer of zeste. Required for stable repression of AG and AP3. Putative role in cell fate determination. Involved in the control of leaf morphogenesis. mutants exhibit curled, involute leaves. AGAMOUS and APETALA3 are ectopically expressed in the mutant.
AT2G26330	ER (ERECTA); transmembrane receptor protein kinase							59.6122	2.55479	1.98997	0	D3	Homologous to receptor protein kinases. Involved in specification of organs originating from the shoot apical meristem. Contains a cytoplasmic protein kinase catalytic domain, a transmembrane region, and an extracellular leucine-rich repeat. ER has been identified as a quantitative trait locus for transpiration efficiency by influencing epidermal and mesophyll development, stomatal density and po…
AT3G05040	HST (HASTY); nucleocytoplasmic transporter							185.695	102.625	107.791	94.2922	D3	Encodes member of importin/exportin family. Involved in timing of shoot maturation. Involved in miRNA transport. Mutants flower early and have small, curled leaves and reduced abundance of certain miRNA species.
AT1G55250	HUB2 (HISTONE MONO-UBIQUITINATION 2); protein binding / zinc ion binding							505.567	410.564	436.127	339.767	D3	Encodes one of two orthologous E3 ubiquitin ligases in Arabidopsis that are involved in monoubiquitination of histone H2B.
AT4G29040	RPT2a (regulatory particle AAA-ATPase 2a); ATPase							332.689	194.773	194.149	199.617	D3	26S proteasome AAA-ATPase subunit RPT2a (RPT2a) mRNA,
AT5G55540	TRN1 (TORNADO 1)							216.156	105.166	121.701	85.2182	D3	Encodes a large plant-specific protein of unknown function, with conserved domains also found in a variety of signaling proteins, In trn mutants, the leaf venation network had a severely reduced complexity: incomplete loops, no tertiary or quaternary veins, and vascular islands. The leaf laminas were asymmetric and narrow because of a severely reduced cell number. TRN1 is required for the mainten…
AT3G23980	unknown protein							424.191	349.357	503.482	437.037	D3	Encodes a protein that interacts with the Polycomb-group (Pc-G) histone methyltransferase CLF (CURLY LEAF). It colocalizes with CLF to the nucleus and represses a subset of Pc-G target genes. The pleiotropic developmental mutant phenotype suggests that BLI prevents premature differentiation.
AT3G13300	VCS (VARICOSE); nucleotide binding / protein homodimerization							3188.37	2418.8	2856.65	2871.69	D3	Encodes VCS (VARICOSE). Involved in mRNA decapping. VCS forms a mRNA decapping complex with DCP1 (At1g08370) and DCP2 (At5g13570). Unlike DCP2, VCS itself does not have mRNA decapping activity in vitro. DCP1, DCP2 and VCS colocalize in cytoplasmic loci, which are putative Arabidopsis mRNA processing bodies. Null mutants of DCP1, DCP2, and VCS accumulate capped mRNAs with a reduced degradation rat…
AT1G48410	AGO1 (ARGONAUTE 1); endoribonuclease/ miRNA binding / protein binding / siRNA binding							5881.95	4420.49	4089.68	2534.92	D4	Encodes an RNA Slicer that selectively recruits microRNAs and siRNAs. There is currently no evidence that AGO1 Slicer is in a high molecular weight RNA-induced silencing complex (RISC). Mutants are defective in post-transcriptional gene silencing and have pleiotropic developmental and morphological defects. Through its action on the regulation of ARF17 expression, the protein regulates genes invo…
AT2G17040	anac036 (Arabidopsis NAC domain containing protein 36); transcription factor							25.4739	34.0634	83.1815	38.3623	D6	Member of the NAC transcription factor family and more specifically, the ONAC022 subfamily. Involved in leaf and inflorescence stem morphogenesis.
AT1G45050	ATUBC2-1; ubiquitin-protein ligase							523.782	568.029	693.781	443.192	D6	member of ubiquitin-conjugating E2-proteins
AT2G44950	HUB1 (HISTONE MONO-UBIQUITINATION 1); protein binding / protein homodimerization/ ubiquitin-protein ligase/ zinc ion binding							528.539	473.402	588.738	341.04	D6	The gene encodes one of two orthologous E3 ubiquitin ligases in Arabidopsis that are involved in monoubiquitination of histone H2B.
AT5G55300	TOP1ALPHA (DNA TOPOISOMERASE I ALPHA); DNA topoisomerase type I							3698.55	3471.29	4272.2	2400.07	D6	Encodes a type-I DNA topoisomerase I. Disruptions in this gene affect phyllotaxis and plant architecture suggesting that the gene plays a critical role in the maintenance of a regular pattern of organ initiation. Isolated as a protein oxidized during seed germination; proteomics approach revealed differences in de novo synthesis levels of this protein in condition with vs. without salicylic acid …

## Sheet: adaxabax all_D
GO:0009944	polarity specification of adaxial/abaxial axis
P(over-represented)	0.0262186
Number of genes	16
Number up-regulated	12
ACCESSION	ANNOTATION							B	M	T	Mat	Cluster
AT1G65620	AS2 (ASYMMETRIC LEAVES 2); protein binding							174.508	75.3101	46.8485	28.5221	D10	required for formation of a symmetric flat leaf lamina, encodes a member of a family of proteins characterized by cysteine repeats and a leucine zipper; involved in KNOX gene regulation. Acts together with ASL1 in proximal-distal symmetry determination. Forms a complex with AS1 that binds to the BP promoter and leads to silencing of BP., Required for formation of a symmetric flat leaf lamina, enc…
AT1G30490	PHV (PHAVOLUTA); DNA binding / protein binding / transcription factor							615.436	168.273	135.493	117.422	D10	Dominant PHV mutations cause transformation of abaxial leaf fates into adaxial leaf fates. Has overlapping functions with PHABULOSA, REVOLUTA and CORONA/ATHB15 in patterning the apical portion of the embryo. Encodes a member of HD-Zip family which contains homeodomain-leucine zipper domains and domain similar to a mammalian sterol binding domain.
AT5G22650	HD2B (HISTONE DEACETYLASE 2B); histone deacetylase							3572.6	924.107	485.114	731.032	D12	Encodes a member of a plant-specific class of histone deacetylases. Controls the development of adaxial/abaxial leaf polarity. Its mRNA is widely expressed in stems, leaves, flowers and young siliques. Plant lines expressing RNAi constructs directed against this gene showed a marked reduction in agrobacterium-mediated root transformation.
AT2G45190	AFO (ABNORMAL FLORAL ORGANS); protein binding / transcription factor/ transcription regulator							3596.98	1888.73	1416.14	1606.15	D2	Encodes a member of the YABBY family of transcriptional regulators that is involved in abaxial cell type specification in leaves and fruits. YAB1 acts in a non-cell autonomous fashion within the meristem to affect phyllotactic patterning. The non-autonomous effect on the central region of the meristem is mediated through the activity if Lateral Suppressor (LAS).
AT2G37630	AS1 (ASYMMETRIC LEAVES 1); DNA binding / protein homodimerization/ transcription factor							995.046	824.691	828.714	936.188	D3	Encodes a MYB-domain protein involved in specification of the leaf proximodistal axis. Mutation results in lobed and dissected leaves with a characteristic asymmetry. Homologous to the Antirrhinum PHANTASTICA (PHAN) and maize ROUGH SHEATH2 (RS2) genes Asymmetric placement of auxin response at the distal leaf tip precedes visible asymmetric leaf growth. Acts alongside AXR1 to exclude BP expression…
AT2G26330	ER (ERECTA); transmembrane receptor protein kinase							59.6122	2.55479	1.98997	0	D3	Homologous to receptor protein kinases. Involved in specification of organs originating from the shoot apical meristem. Contains a cytoplasmic protein kinase catalytic domain, a transmembrane region, and an extracellular leucine-rich repeat. ER has been identified as a quantitative trait locus for transpiration efficiency by influencing epidermal and mesophyll development, stomatal density and po…
AT3G05040	HST (HASTY); nucleocytoplasmic transporter							185.695	102.625	107.791	94.2922	D3	Encodes member of importin/exportin family. Involved in timing of shoot maturation. Involved in miRNA transport. Mutants flower early and have small, curled leaves and reduced abundance of certain miRNA species.
AT5G16560	KAN (KANADI); transcription factor							154.502	118.154	138.154	127.722	D3	Encodes a KANADI protein (KAN) that regulates organ polarity in Arabidopsis. KAN is required for abaxial identity in both leaves and carpels, and encodes a nuclear-localized protein in the GARP family of putative transcription factors. Together with KAN2, this gene appears to be involved in the development of the carpel and the outer integument of the ovule.Along with KAN2 and KAN4, KAN1 appears …
AT5G55250	IAMT1 (IAA CARBOXYLMETHYLTRANSFERASE 1); S-adenosylmethionine-dependent methyltransferase/ indole acetic acid carboxyl methyltransferase							68.963	8.93888	4.3877	3.5619	D3	Encodes an enzyme which specifically converts IAA to its methyl ester form MelIAA. This gene belongs to the family of carboxyl methyltransferases whose members catalyze the transfer of the methyl group from S-adenosyl-L-methionine to carboxylic acid-containing substrates to form small molecule methyl esters. Expression of TCP genes is downregulated in mutant iamt1-D.
AT2G34710	PHB (PHABULOSA); DNA binding / transcription factor							1490.13	943.483	1024.89	578.345	D4	Dominant PHB mutations cause transformation of abaxial leaf fates into adaxial leaf fates. Encodes a member of HD-Zip family which contains homeodomain-leucine zipper domains and domain similar to a mammalian sterol binding domain. Has overlapping functions with PHAVOLUTA, REVOLUTA and CORONA.
AT5G60690	REV (REVOLUTA); DNA binding / lipid binding / transcription factor							108.146	63.9543	69.7896	24.0167	D4	REVOLUTA regulates meristem initiation at lateral positions. a member of a small homeodomain-leucine zipper family. Has overlapping functions with PHAVOLUTA and PHABULOSA.
AT1G68310	vacuolar sorting signal binding							151.26	122.315	113.268	126.59	D8	Encodes a protein that has been shown to specifically interact with a sequence motif, PIEPPPHH, in the cytoplasmic tail of a membrane protein that directs the protein from the ER to vacuoles where it is internalized.

## Sheet: plasmodesmata all_D
GO:0010497	plasmodesmata-mediated intercellular transport
P(over-represented)	0.0262431
Number of genes	6
Number up-regulated	6
ACCESSION	ANNOTATION							B	M	T	Mat	Cluster
AT1G04520	PDLP2 (PLASMODESMATA-LOCATED PROTEIN 2)							1732.08	1471.9	1417.8	993.437	D10	0
AT5G08120	MBP2C (MICROTUBULE BINDING PROTEIN 2C); protein binding							412.391	248.665	216.463	173.942	D10	Microtubule-associated and viral movement protein binding protein. Negatively regulates KN1 association to plasmodesmata and, consequently, cell-to-cell transport. Involved in the alignment of cortical microtubules, the patterning of stomata and in restricting tobamoviral infections.
AT1G70070	EMB25 (EMBRYO DEFECTIVE 25); ATP-dependent helicase/ RNA helicase							487.137	354.44	324.395	261.125	D10	Allelic to ISE2(increased size exclusion limit of plasmodesmata 2). Mutants maintain dilated plasmodesmata at the embryonic torpedo stage.
AT5G43980	PDLP1 (PLASMODESMATA-LOCATED PROTEIN 1)							64.0229	20.7498	14.6596	13.5415	D3	Encodes a plasmodesmal protein that affects the intercellular movement of molecules through the plasmodesmata. The cytoplasmic C-terminal portion of the protein is connected to the apoplastic N-terminal portion of the protein by a single transmembrane domain (TMD). It is transported to the plasmodesmata through the secretory pathway. PDLP1 has two DUF26 domains and a signal peptide, but the prope…
AT2G15570	thioredoxin M-type 3, chloroplast (TRX-M3)							294.571	161.336	152.837	180.618	D3	chloroplast protein similar to prokaryotic thioredoxin.
AT1G12770	EMB1586 (embryo defective 1586); ATP binding / ATP-dependent helicase/ helicase/ nucleic acid binding							1699.08	1574.16	1631.43	1534.1	D8	Encodes a DEAD-box RNA helicase that localizes to mitochondria and is essential for regulating cell-to-cell transport via plasmodesmata.

## Sheet: HAT activity all_D
GO:0004402	histone acetyltransferase activity
P(over-represented)	0.0490754
Number of genes	17
Number up-regulated	13
ACCESSION	ANNOTATION							B	M	T	Mat	Cluster
AT3G01460	MBD9; DNA binding / methyl-CpG binding							573.517	415.496	454.548	302.196	D10	Encodes a protein with a methyl-CpG-binding domain. Has sequence similarity to human MBD proteins. Involved in the modification of the FLC chromatin acetylation state to affect FLC expression. Mutants show an early flowering, and enhanced shoot branching phenotypes.
AT3G54610	GCN5; DNA binding / H3 histone acetyltransferase/ histone acetyltransferase							580.537	440.569	417.413	352.252	D10	Encodes a histone acetyltransferase that is plays a role in the determination of the embryonic root-shoot axis. It is also required to regulate the floral meristem activity by modulating the extent of expression of WUS and AG. In other eukaryotes, this protein is recruited to specific promoters by DNA binding transcription factors and is thought to promote transcription by acetylating the N-termi…
AT5G56740	HAG2 (HISTONE ACETYLTRANSFERASE OF THE GNAT FAMILY 2); H4 histone acetyltransferase/ histone acetyltransferase							610.149	176.335	98.3969	85.1467	D2	Encodes an enzyme with histone acetyltransferase activity. Histone H4 is the primary substrate for the enzyme. Prior acetylation of lysine 12 of histone H4 reduces radioactive acetylation by HAG2. HAG2 acetylates histone H4 lysine 12.
AT3G12980	HAC5; H3/H4 histone acetyltransferase/ histone acetyltransferase							900.184	713.07	845.076	795.892	D3	Encodes an enzyme with histone acetyltransferase activity that can use both H3 and H4 histones as substrates. No single prior lysine acetylation is sufficient to block HAC5 acetylation of the H3 or H4 peptides, suggesting that HAC5 can acetylate any of several lysines present in the peptides. Di-acetylation of both lysines 9 and 14 on the H3 peptide significantly reduces the level of incorporated…
AT5G50320	ELO3 (ELONGATA 3); histone acetyltransferase							1057.39	684.916	692.143	732.105	D3	A subunit of Elongator, a histone acetyl transferase complex, consisting of six subunits (ELP1–ELP6), that copurifies with the elongating RNAPII in yeast and humans. Three Arabidopsis thaliana genes, encoding homologs of the yeast Elongator subunits ELP1, ELP3 (histone acetyl transferase), and ELP4 are responsible for the narrow leaf phenotype in elongata mutants and for reduced root growth that …
AT5G64610	HAM1 (HISTONE ACETYLTRANSFERASE OF THE MYST FAMILY 1); H3/H4 histone acetyltransferase/ histone acetyltransferase/ nucleic acid binding / zinc ion binding							425.149	306.035	374.152	271.993	D3	Encodes an enzyme with histone acetyltransferase activity. HAM1 primarily acetylate histone H4, but also display some ability to acetylate H3. Prior acetylation of lysine 5 on histone H4 reduces radioactive acetylation by either HAM1. HAM1 acetylates histone H4 lysine 5.
AT3G19040	HAF2 (HISTONE ACETYLTRANSFERASE OF THE TAFII250 FAMILY 2); DNA binding / histone acetyltransferase/ transcription cofactor							973.758	707.073	890.862	574.352	D4	Encodes a protein similar to TATA-binding protein-associated factor TAF1 (a.k.a. TAFII250) with histone acetyltransferase activity. It is required in integrating light signals to regulate gene expression and growth.
AT5G67480	BT4 (BTB AND TAZ DOMAIN PROTEIN 4); protein binding / transcription regulator							187.525	265.016	375.853	51.964	D6	BTB and TAZ domain protein. Located in cytoplasm and expressed in fruit, flower and leaves.
AT5G63160	BT1 (BTB AND TAZ DOMAIN PROTEIN 1); protein binding / transcription regulator							669.242	669.376	913.13	9.08521	D6	BTB and TAZ domain protein. Short-lived nuclear-cytoplasmic protein targeted for degradation by the 26S proteosome pathway. Acts redundantly with BT2 and BT3 during female gametophyte development.
AT3G52280	GTE6 (GENERAL TRANSCRIPTION FACTOR GROUP E6); DNA binding / H3/H4 histone acetyltransferase							279.332	247.892	349.019	197.563	D6	Bromodomain containing nuclear-localized protein involved in leaf development. GTE6 binds to the promoter and intron of AS1 and regulates its expression via histone acetylation.
AT1G79000	HAC1 (HISTONE ACETYLTRANSFERASE OF THE CBP FAMILY 1); H3/H4 histone acetyltransferase/ histone acetyltransferase/ transcription cofactor							1096.84	1056.14	1359.84	912.851	D6	Homologous to CREB-binding protein, a co-activator of transcription with histone acetyl-transferase activity. No single prior lysine acetylation is sufficient to block HAC1 acetylation of the H3 or H4 peptides, suggesting that HAC1, HAC5, and HAC12 can acetylate any of several lysines present in the peptides. HAM2 acetylates histone H4 lysine 5. A plant line expressing an RNAi construct targeted …
AT3G48360	BT2 (BTB AND TAZ DOMAIN PROTEIN 2); protein binding / transcription factor/ transcription regulator							2669.53	3923.29	3899.98	58.1569	D6	encodes a protein (BT2) that is an essential component of the TAC1-mediated telomerase activation pathway. Acts redundantly with BT3 and BT1 during female gametophyte development and with BT3 during male gametophyte development. BT2 also mediates multiple responses to nutrients, stresses, and hormones.
AT4G37610	BT5 (BTB AND TAZ DOMAIN PROTEIN 5); protein binding / transcription regulator							2645.26	4162.83	5975.72	197.853	D6	BTB and TAZ domain protein. Located in cytoplasm and expressed in fruit, flower and leaves.

## Sheet: endorep D4
GO:0042023	DNA endoreduplication
P(over-represented)	0.0251787
Number of genes	16
Number up-regulated	5
ACCESSION	ANNOTATION
AT1G47870	ATE2F2; DNA binding / protein heterodimerization/ transcription factor
AT5G25380	CYCA2;1 (cyclin a2;1); cyclin-dependent protein kinase regulator
AT3G48750	CDC2 (CELL DIVISION CONTROL 2); cyclin-dependent protein kinase/ kinase/ protein binding / protein kinase
AT4G38600	KAK (KAKTUS); ubiquitin-protein ligase
AT2G42260	UVI4 (UV-B-INSENSITIVE 4)

## Sheet: Histone lysine Me D8
GO:0034968	histone lysine methylation
P(over-represented)	0.0137899
Number of genes	12
Number up-regulated	5
ACCESSION	ANNOTATION
AT3G26850
AT2G35160	SUVH5 (SU(VAR)3-9 HOMOLOG 5); histone methyltransferase
AT2G22740	SUVH6; methyl-CpG binding / methyl-CpNpG binding / methyl-CpNpN binding / methyltransferase
AT3G04380	SUVR4; histone-lysine N-methyltransferase
AT3G03750	SET domain-containing protein

## Sheet: chromatin modif D10
GO:0016568	chromatin modification
P(over-represented)	0.00539821
Number of genes	5
Number up-regulated	4
ACCESSION	ANNOTATION
AT5G58230	MSI1 (MULTICOPY SUPRESSOR OF IRA1); protein binding
AT3G17590	BSH (BUSHY GROWTH); chromatin binding / protein binding
AT2G27100	SE (SERRATE); DNA binding / transcription factor
AT3G24440	VRN5 (VERNALIZATION 5)
