# Supplementary material for: Deep Evolutionary Comparison of Gene Expression Identifies Parallel Recruitment of Trans-Factors in Two Independent Origins of C4 Photosynthesis
Source: PLoS Genet. 2014 Jun 5;10(6):e1004365. doi: 10.1371/journal.pgen.1004365 (PMC4046924; doi:10.1371/journal.pgen.1004365)
Supplement: Table S11 — Transcription factors in common between C. gynandra and maize after comparative analysis of gene expression in leaf gradients. Arabidopsis thaliana accession numbers are listed more than once if multiple paralogues/homeologues exist in the maize genome. Genes were classified in potential positive or negative regulators based on their presence in the C4-related clusters. (XLSX) [file pgen.1004365.s025.xlsx]

## Sheet: legend
	Table S11: Transcription factors in common between C. gynandra and maize after comparative analysis of gene expression in leaf gradients. Arabidopsis thaliana accession numbers are listed more than once if multiple paralogues/homeologues exist in the maize genome. Genes were classified in potential positive or negative regulators based on their presence in the C4-related clusters.

## Sheet: Homologous TFs
Positive regulators
At	Zm	Family	Annotation	GO terms
AT2G35940	GRMZM2G458728	HB	BLH1 (BEL1-LIKE HOMEODOMAIN 1); DNA binding / protein heterodimerization/ protein homodimerization/ transcription factor	GO:0003677:DNA binding, GO:0005634:nucleus, GO:0006355:regulation of transcription, DNA-dependent, GO:0046982:protein heterodimerization activity, GO:0009610:response to symbiotic fungus, GO:0042803:protein homodimerization activity, GO:0010201:response to continuous far red light stimulus by the high-irradiance response system, GO:0005737:cytoplasm, GO:0009737:response to abscisic acid stimulus,…
AT2G05160	GRMZM2G148090	C3H	zinc finger (CCCH-type) family protein / RNA recognition motif (RRM)-containing protein	GO:0003723:RNA binding, GO:0000166:nucleotide binding, GO:0008270:zinc ion binding, GO:0008150:biological_process, GO:0003676:nucleic acid binding,
AT1G72030	GRMZM2G302778	GNAT	GCN5-related N-acetyltransferase (GNAT) family protein	GO:0008152:metabolic process, GO:0008080:N-acetyltransferase activity,
AT1G25440	GRMZM2G041991	C2C2-CO-like	zinc finger (B-box type) family protein	GO:0016020:membrane, GO:0005515:protein binding, GO:0006355:regulation of transcription, DNA-dependent, GO:0005622:intracellular, GO:0008270:zinc ion binding, GO:0003700:sequence-specific DNA binding transcription factor activity,
AT1G25440	GRMZM2G114137	C2C2-CO-like	zinc finger (B-box type) family protein	GO:0016020:membrane, GO:0005515:protein binding, GO:0006355:regulation of transcription, DNA-dependent, GO:0005622:intracellular, GO:0008270:zinc ion binding, GO:0003700:sequence-specific DNA binding transcription factor activity,
AT1G25440	GRMZM2G107886	C2C2-CO-like	zinc finger (B-box type) family protein	GO:0016020:membrane, GO:0005515:protein binding, GO:0006355:regulation of transcription, DNA-dependent, GO:0005622:intracellular, GO:0008270:zinc ion binding, GO:0003700:sequence-specific DNA binding transcription factor activity,
AT1G25440	GRMZM2G144346	C2C2-CO-like	zinc finger (B-box type) family protein	GO:0016020:membrane, GO:0005515:protein binding, GO:0006355:regulation of transcription, DNA-dependent, GO:0005622:intracellular, GO:0008270:zinc ion binding, GO:0003700:sequence-specific DNA binding transcription factor activity,
AT1G25440	GRMZM2G012717	C2C2-CO-like	zinc finger (B-box type) family protein	GO:0016020:membrane, GO:0005515:protein binding, GO:0006355:regulation of transcription, DNA-dependent, GO:0005622:intracellular, GO:0008270:zinc ion binding, GO:0003700:sequence-specific DNA binding transcription factor activity,
AT5G67030	GRMZM2G136344	FHA	ABA1 (ABA DEFICIENT 1); zeaxanthin epoxidase	GO:0016123:xanthophyll biosynthetic process, GO:0016020:membrane, GO:0009540:zeaxanthin epoxidase [overall] activity, GO:0008152:metabolic process, GO:0009414:response to water deprivation, GO:0006970:response to osmotic stress, GO:0009408:response to heat, GO:0055114:oxidation-reduction process, GO:0010182:sugar mediated signaling pathway, GO:0009688:abscisic acid biosynthetic process, GO:000551…
AT5G67030	GRMZM2G127139	FHA	ABA1 (ABA DEFICIENT 1); zeaxanthin epoxidase	GO:0016123:xanthophyll biosynthetic process, GO:0016020:membrane, GO:0009540:zeaxanthin epoxidase [overall] activity, GO:0008152:metabolic process, GO:0009414:response to water deprivation, GO:0006970:response to osmotic stress, GO:0009408:response to heat, GO:0055114:oxidation-reduction process, GO:0010182:sugar mediated signaling pathway, GO:0009688:abscisic acid biosynthetic process, GO:000551…
AT3G53920	GRMZM5G830932	Sigma70-like	SIGC (RNA POLYMERASE SIGMA-SUBUNIT C); DNA binding / DNA-directed RNA polymerase/ sigma factor/ transcription factor	GO:0003677:DNA binding, GO:0006355:regulation of transcription, DNA-dependent, GO:0019685:photosynthesis, dark reaction, GO:0006352:transcription initiation, DNA-dependent, GO:0003899:DNA-directed RNA polymerase activity, GO:0003700:sequence-specific DNA binding transcription factor activity, GO:0016987:sigma factor activity, GO:0009507:chloroplast,
AT5G49330	GRMZM2G701063	MYB	AtMYB111 (myb domain protein 111); DNA binding / transcription factor	GO:0003677:DNA binding, GO:0051555:flavonol biosynthetic process, GO:0005515:protein binding, GO:0006355:regulation of transcription, DNA-dependent, GO:0003700:sequence-specific DNA binding transcription factor activity,
AT2G41940	GRMZM2G703281	C2H2	ZFP8 (ZINC FINGER PROTEIN 8); nucleic acid binding / transcription factor/ zinc ion binding	GO:0010026:trichome differentiation, GO:0006355:regulation of transcription, DNA-dependent, GO:0005622:intracellular, GO:0008270:zinc ion binding, GO:0003700:sequence-specific DNA binding transcription factor activity, GO:0003676:nucleic acid binding,
AT2G21530	GRMZM2G177895	FHA	forkhead-associated domain-containing protein / FHA domain-containing protein	GO:0009535:chloroplast thylakoid membrane, GO:0005515:protein binding, GO:0008150:biological_process, GO:0009507:chloroplast, GO:0009570:chloroplast stroma,
AT1G32070	GRMZM2G701207	GNAT	ATNSI (NUCLEAR SHUTTLE INTERACTING); N-acetyltransferase	GO:0005634:nucleus, GO:0008152:metabolic process, GO:0046739:spread of virus in host, GO:0008080:N-acetyltransferase activity, GO:0009405:pathogenesis, GO:0009507:chloroplast,
AT1G64860	GRMZM2G543629	Sigma70-like	SIGA (SIGMA FACTOR A); DNA binding / DNA-directed RNA polymerase/ sigma factor/ transcription factor	GO:0003677:DNA binding, GO:0006355:regulation of transcription, DNA-dependent, GO:0006352:transcription initiation, DNA-dependent, GO:0003899:DNA-directed RNA polymerase activity, GO:0005515:protein binding, GO:0003700:sequence-specific DNA binding transcription factor activity, GO:0016987:sigma factor activity, GO:0009507:chloroplast,
AT1G64860	GRMZM2G006736	Sigma70-like	SIGA (SIGMA FACTOR A); DNA binding / DNA-directed RNA polymerase/ sigma factor/ transcription factor	GO:0003677:DNA binding, GO:0006355:regulation of transcription, DNA-dependent, GO:0006352:transcription initiation, DNA-dependent, GO:0003899:DNA-directed RNA polymerase activity, GO:0005515:protein binding, GO:0003700:sequence-specific DNA binding transcription factor activity, GO:0016987:sigma factor activity, GO:0009507:chloroplast,
AT1G75250	GRMZM2G114503	MYB-related	ATRL6 (ARABIDOPSIS RAD-LIKE 6); transcription factor	GO:0003677:DNA binding, GO:0005515:protein binding, GO:0006355:regulation of transcription, DNA-dependent, GO:0003700:sequence-specific DNA binding transcription factor activity,
AT1G75250	GRMZM2G150260	MYB-related	ATRL6 (ARABIDOPSIS RAD-LIKE 6); transcription factor	GO:0003677:DNA binding, GO:0005515:protein binding, GO:0006355:regulation of transcription, DNA-dependent, GO:0003700:sequence-specific DNA binding transcription factor activity,
AT2G03500	GRMZM2G171468	G2-like	myb family transcription factor	GO:0003677:DNA binding, GO:0005515:protein binding, GO:0006355:regulation of transcription, DNA-dependent, GO:0003700:sequence-specific DNA binding transcription factor activity,
AT5G41410	GRMZM2G064466	HB	BEL1 (BELL 1); DNA binding / protein binding / transcription factor	GO:0005634:nucleus, GO:0003677:DNA binding, GO:0009506:plasmodesma, GO:0006355:regulation of transcription, DNA-dependent, GO:0048481:ovule development, GO:0005515:protein binding, GO:0005829:cytosol, GO:0043565:sequence-specific DNA binding, GO:0003700:sequence-specific DNA binding transcription factor activity,
AT5G41410	GRMZM2G013617	HB	BEL1 (BELL 1); DNA binding / protein binding / transcription factor	GO:0005634:nucleus, GO:0003677:DNA binding, GO:0009506:plasmodesma, GO:0006355:regulation of transcription, DNA-dependent, GO:0048481:ovule development, GO:0005515:protein binding, GO:0005829:cytosol, GO:0043565:sequence-specific DNA binding, GO:0003700:sequence-specific DNA binding transcription factor activity,
AT5G41410	GRMZM2G327059	HB	BEL1 (BELL 1); DNA binding / protein binding / transcription factor	GO:0005634:nucleus, GO:0003677:DNA binding, GO:0009506:plasmodesma, GO:0006355:regulation of transcription, DNA-dependent, GO:0048481:ovule development, GO:0005515:protein binding, GO:0005829:cytosol, GO:0043565:sequence-specific DNA binding, GO:0003700:sequence-specific DNA binding transcription factor activity,
AT1G08540	GRMZM2G003182	Sigma70-like	SIG2 (RNA POLYMERASE SIGMA SUBUNIT 2); DNA binding / DNA-directed RNA polymerase/ sigma factor/ transcription factor	GO:0003677:DNA binding, GO:0009637:response to blue light, GO:0006355:regulation of transcription, DNA-dependent, GO:0006352:transcription initiation, DNA-dependent, GO:0003899:DNA-directed RNA polymerase activity, GO:0016987:sigma factor activity, GO:0003700:sequence-specific DNA binding transcription factor activity, GO:0010114:response to red light, GO:0009507:chloroplast,
AT1G08540	GRMZM2G164084	Sigma70-like	SIG2 (RNA POLYMERASE SIGMA SUBUNIT 2); DNA binding / DNA-directed RNA polymerase/ sigma factor/ transcription factor	GO:0003677:DNA binding, GO:0009637:response to blue light, GO:0006355:regulation of transcription, DNA-dependent, GO:0006352:transcription initiation, DNA-dependent, GO:0003899:DNA-directed RNA polymerase activity, GO:0016987:sigma factor activity, GO:0003700:sequence-specific DNA binding transcription factor activity, GO:0010114:response to red light, GO:0009507:chloroplast,
AT1G08540	GRMZM2G100086	Sigma70-like	SIG2 (RNA POLYMERASE SIGMA SUBUNIT 2); DNA binding / DNA-directed RNA polymerase/ sigma factor/ transcription factor	GO:0003677:DNA binding, GO:0009637:response to blue light, GO:0006355:regulation of transcription, DNA-dependent, GO:0006352:transcription initiation, DNA-dependent, GO:0003899:DNA-directed RNA polymerase activity, GO:0016987:sigma factor activity, GO:0003700:sequence-specific DNA binding transcription factor activity, GO:0010114:response to red light, GO:0009507:chloroplast,
AT1G08540	GRMZM2G143392	Sigma70-like	SIG2 (RNA POLYMERASE SIGMA SUBUNIT 2); DNA binding / DNA-directed RNA polymerase/ sigma factor/ transcription factor	GO:0003677:DNA binding, GO:0009637:response to blue light, GO:0006355:regulation of transcription, DNA-dependent, GO:0006352:transcription initiation, DNA-dependent, GO:0003899:DNA-directed RNA polymerase activity, GO:0016987:sigma factor activity, GO:0003700:sequence-specific DNA binding transcription factor activity, GO:0010114:response to red light, GO:0009507:chloroplast,
AT1G49010	GRMZM2G301642	MYB	myb family transcription factor	GO:0009733:response to auxin stimulus, GO:0003677:DNA binding, GO:0009753:response to jasmonic acid stimulus, GO:0009739:response to gibberellin stimulus, GO:0009751:response to salicylic acid stimulus, GO:0046686:response to cadmium ion, GO:0005515:protein binding, GO:0009651:response to salt stress, GO:0003700:sequence-specific DNA binding transcription factor activity,
AT5G03510	GRMZM2G140299	C2H2	zinc finger (C2H2 type) family protein	GO:0006355:regulation of transcription, DNA-dependent, GO:0008270:zinc ion binding, GO:0005622:intracellular, GO:0003700:sequence-specific DNA binding transcription factor activity, GO:0003676:nucleic acid binding,
AT3G47500	GRMZM2G138455	C2C2-Dof	CDF3 (CYCLING DOF FACTOR 3); DNA binding / protein binding / transcription factor	GO:0003677:DNA binding, GO:0005515:protein binding, GO:0006355:regulation of transcription, DNA-dependent, GO:0008270:zinc ion binding, GO:0003700:sequence-specific DNA binding transcription factor activity,
Negative regulators
AT3G50700	GRMZM2G177693	C2H2	AtIDD2 (Arabidopsis thaliana Indeterminate(ID)-Domain 2); nucleic acid binding / transcription factor/ zinc ion binding	GO:0006355:regulation of transcription, DNA-dependent, GO:0005622:intracellular, GO:0008270:zinc ion binding, GO:0003700:sequence-specific DNA binding transcription factor activity, GO:0009507:chloroplast, GO:0003676:nucleic acid binding,
AT1G68810	GRMZM2G526668	bHLH	basic helix-loop-helix (bHLH) family protein	GO:0003677:DNA binding, GO:0006355:regulation of transcription, DNA-dependent, GO:0003700:sequence-specific DNA binding transcription factor activity,
AT1G68810	GRMZM2G176141	bHLH	basic helix-loop-helix (bHLH) family protein	GO:0003677:DNA binding, GO:0006355:regulation of transcription, DNA-dependent, GO:0003700:sequence-specific DNA binding transcription factor activity,
AT2G24260	GRMZM2G350165	bHLH	basic helix-loop-helix (bHLH) family protein	GO:0003677:DNA binding, GO:0006355:regulation of transcription, DNA-dependent, GO:0003700:sequence-specific DNA binding transcription factor activity, GO:0080147:root hair cell development,
AT2G01940	GRMZM2G465595	C2H2	nucleic acid binding / transcription factor/ zinc ion binding	GO:0009959:negative gravitropism, GO:0005634:nucleus, GO:0006355:regulation of transcription, DNA-dependent, GO:2000904:regulation of starch metabolic process, GO:0005622:intracellular, GO:0003676:nucleic acid binding, GO:0009590:detection of gravity, GO:0008270:zinc ion binding, GO:0003700:sequence-specific DNA binding transcription factor activity, GO:0010031:circumnutation,
AT3G57670	GRMZM2G084014	C2H2	NTT (NO TRANSMITTING TRACT); nucleic acid binding / transcription factor/ zinc ion binding	GO:0005634:nucleus, GO:0010500:transmitting tissue development, GO:0006355:regulation of transcription, DNA-dependent, GO:0005622:intracellular, GO:0009860:pollen tube growth, GO:0003676:nucleic acid binding, GO:0008270:zinc ion binding, GO:0003700:sequence-specific DNA binding transcription factor activity,
AT2G36400	GRMZM2G124566	GRF	AtGRF3 (GROWTH-REGULATING FACTOR 3); transcription activator	GO:0005634:nucleus, GO:0005524:ATP binding, GO:0009624:response to nematode, GO:0048364:root development, GO:0005515:protein binding, GO:0016818:hydrolase activity, acting on acid anhydrides, in phosphorus-containing anhydrides, GO:0061062:regulation of nematode larval development, GO:0048366:leaf development,
AT1G20696	GRMZM5G834758	HMG	HMGB3 (HIGH MOBILITY GROUP B 3); DNA binding / chromatin binding / structural constituent of chromatin / transcription factor	GO:0003677:DNA binding, GO:0006333:chromatin assembly or disassembly, GO:0005515:protein binding, GO:0000785:chromatin, GO:0003682:chromatin binding, GO:0003700:sequence-specific DNA binding transcription factor activity, GO:0030527:structural constituent of chromatin,
AT1G20696	GRMZM2G066528	HMG	HMGB3 (HIGH MOBILITY GROUP B 3); DNA binding / chromatin binding / structural constituent of chromatin / transcription factor	GO:0003677:DNA binding, GO:0006333:chromatin assembly or disassembly, GO:0005515:protein binding, GO:0000785:chromatin, GO:0003682:chromatin binding, GO:0003700:sequence-specific DNA binding transcription factor activity, GO:0030527:structural constituent of chromatin,
AT1G20696	GRMZM2G162284	HMG	HMGB3 (HIGH MOBILITY GROUP B 3); DNA binding / chromatin binding / structural constituent of chromatin / transcription factor	GO:0003677:DNA binding, GO:0006333:chromatin assembly or disassembly, GO:0005515:protein binding, GO:0000785:chromatin, GO:0003682:chromatin binding, GO:0003700:sequence-specific DNA binding transcription factor activity, GO:0030527:structural constituent of chromatin,
AT5G11260	GRMZM2G039828	bZIP	HY5 (ELONGATED HYPOCOTYL 5); DNA binding / double-stranded DNA binding / transcription factor	GO:0010017:red or far-red light signaling pathway, GO:0003677:DNA binding, GO:0006355:regulation of transcription, DNA-dependent, GO:0003690:double-stranded DNA binding, GO:0009640:photomorphogenesis, GO:0046983:protein dimerization activity, GO:0005515:protein binding, GO:0010218:response to far red light, GO:0043565:sequence-specific DNA binding, GO:0009963:positive regulation of flavonoid bios…
AT3G10760	GRMZM2G398055	G2-like	myb family transcription factor	GO:0003677:DNA binding, GO:0005515:protein binding, GO:0006355:regulation of transcription, DNA-dependent, GO:0003700:sequence-specific DNA binding transcription factor activity,
AT3G49950	GRMZM2G097456	GRAS	scarecrow transcription factor family protein	GO:0006355:regulation of transcription, DNA-dependent, GO:0003700:sequence-specific DNA binding transcription factor activity,
AT4G02670	GRMZM2G011357	C2H2	AtIDD12 (Arabidopsis thaliana Indeterminate(ID)-Domain 12); nucleic acid binding / transcription factor/ zinc ion binding	GO:0006355:regulation of transcription, DNA-dependent, GO:0008270:zinc ion binding, GO:0005622:intracellular, GO:0003700:sequence-specific DNA binding transcription factor activity, GO:0003676:nucleic acid binding, GO:0009507:chloroplast,
AT3G60400	GRMZM2G062910	mTERF	mitochondrial transcription termination factor-related / mTERF-related	GO:0003674:molecular_function, GO:0005575:cellular_component, GO:0008150:biological_process,
AT3G14020	GRMZM2G000686	CCAAT	NF-YA6 (NUCLEAR FACTOR Y, SUBUNIT A6); transcription factor	GO:0003677:DNA binding, GO:0005634:nucleus, GO:0016602:CCAAT-binding factor complex, GO:0006355:regulation of transcription, DNA-dependent, GO:0003700:sequence-specific DNA binding transcription factor activity, GO:0009507:chloroplast,
AT2G47620	GRMZM2G135410	MYB-related	ATSWI3A (SWITCH/SUCROSE NONFERMENTING 3A); DNA binding	GO:0003677:DNA binding, GO:0005515:protein binding, GO:0006338:chromatin remodeling, GO:0016514:SWI/SNF complex,
AT1G14510	GRMZM2G008259	Alfin-like	AL7 (ALFIN-LIKE 7); DNA binding / methylated histone residue binding	GO:0005634:nucleus, GO:0003677:DNA binding, GO:0005515:protein binding, GO:0006355:regulation of transcription, DNA-dependent, GO:0008270:zinc ion binding, GO:0035064:methylated histone residue binding,
AT2G01570	GRMZM2G144744	GRAS	RGA1 (REPRESSOR OF GA1-3 1); protein binding / transcription factor	GO:0006355:regulation of transcription, DNA-dependent, GO:0009723:response to ethylene stimulus, GO:0005515:protein binding, GO:0010218:response to far red light, GO:0009651:response to salt stress, GO:0003700:sequence-specific DNA binding transcription factor activity, GO:0009740:gibberellic acid mediated signaling pathway, GO:0005634:nucleus, GO:0009938:negative regulation of gibberellic acid m…
AT1G30330	GRMZM2G035405	ARF	ARF6 (AUXIN RESPONSE FACTOR 6); transcription factor	GO:0005634:nucleus, GO:0003677:DNA binding, GO:0009733:response to auxin stimulus, GO:0006355:regulation of transcription, DNA-dependent, GO:0046983:protein dimerization activity, GO:0009908:flower development, GO:0009725:response to hormone stimulus, GO:0003700:sequence-specific DNA binding transcription factor activity,
AT1G30330	GRMZM2G073750	ARF	ARF6 (AUXIN RESPONSE FACTOR 6); transcription factor	GO:0005634:nucleus, GO:0003677:DNA binding, GO:0009733:response to auxin stimulus, GO:0006355:regulation of transcription, DNA-dependent, GO:0046983:protein dimerization activity, GO:0009908:flower development, GO:0009725:response to hormone stimulus, GO:0003700:sequence-specific DNA binding transcription factor activity,
AT1G30330	GRMZM2G028980	ARF	ARF6 (AUXIN RESPONSE FACTOR 6); transcription factor	GO:0005634:nucleus, GO:0003677:DNA binding, GO:0009733:response to auxin stimulus, GO:0006355:regulation of transcription, DNA-dependent, GO:0046983:protein dimerization activity, GO:0009908:flower development, GO:0009725:response to hormone stimulus, GO:0003700:sequence-specific DNA binding transcription factor activity,
AT1G46264	GRMZM2G025685	HSF	AT-HSFB4; DNA binding / transcription factor	GO:0005634:nucleus, GO:0003677:DNA binding, GO:0008356:asymmetric cell division, GO:0006355:regulation of transcription, DNA-dependent, GO:0043565:sequence-specific DNA binding, GO:0003700:sequence-specific DNA binding transcription factor activity,
AT3G51950	GRMZM2G086614	C3H	zinc finger (CCCH-type) family protein / RNA recognition motif (RRM)-containing protein	GO:0005575:cellular_component, GO:0003723:RNA binding, GO:0000166:nucleotide binding, GO:0008270:zinc ion binding, GO:0008150:biological_process, GO:0003676:nucleic acid binding,
AT3G51950	GRMZM2G044004	C3H	zinc finger (CCCH-type) family protein / RNA recognition motif (RRM)-containing protein	GO:0005575:cellular_component, GO:0003723:RNA binding, GO:0000166:nucleotide binding, GO:0008270:zinc ion binding, GO:0008150:biological_process, GO:0003676:nucleic acid binding,
AT3G51950	GRMZM2G346113	C3H	zinc finger (CCCH-type) family protein / RNA recognition motif (RRM)-containing protein	GO:0005575:cellular_component, GO:0003723:RNA binding, GO:0000166:nucleotide binding, GO:0008270:zinc ion binding, GO:0008150:biological_process, GO:0003676:nucleic acid binding,
AT3G51950	GRMZM2G003424	C3H	zinc finger (CCCH-type) family protein / RNA recognition motif (RRM)-containing protein	GO:0005575:cellular_component, GO:0003723:RNA binding, GO:0000166:nucleotide binding, GO:0008270:zinc ion binding, GO:0008150:biological_process, GO:0003676:nucleic acid binding,
AT1G76890	GRMZM2G063203	Trihelix	GT2; transcription factor	GO:0003677:DNA binding, GO:0003700:sequence-specific DNA binding transcription factor activity,
AT1G76890	GRMZM2G169580	Trihelix	GT2; transcription factor	GO:0003677:DNA binding, GO:0003700:sequence-specific DNA binding transcription factor activity,
AT1G76890	GRMZM2G111760	Trihelix	GT2; transcription factor	GO:0003677:DNA binding, GO:0003700:sequence-specific DNA binding transcription factor activity,
AT2G39020	AC149475.2_FG007	GNAT	GCN5-related N-acetyltransferase (GNAT) family protein	GO:0008152:metabolic process, GO:0008080:N-acetyltransferase activity, GO:0009507:chloroplast,
AT3G14980	GRMZM2G357660	PHD	PHD finger transcription factor, putative	GO:0005634:nucleus, GO:0003677:DNA binding, GO:0009506:plasmodesma, GO:0005515:protein binding, GO:0006355:regulation of transcription, DNA-dependent, GO:0008270:zinc ion binding, GO:0008080:N-acetyltransferase activity,
AT3G14980	GRMZM2G038050	PHD	PHD finger transcription factor, putative	GO:0005634:nucleus, GO:0003677:DNA binding, GO:0009506:plasmodesma, GO:0005515:protein binding, GO:0006355:regulation of transcription, DNA-dependent, GO:0008270:zinc ion binding, GO:0008080:N-acetyltransferase activity,
AT4G36920	GRMZM2G160730	AP2-EREBP	AP2 (APETALA 2); transcription factor	GO:0003677:DNA binding, GO:0005634:nucleus, GO:0030154:cell differentiation, GO:0006355:regulation of transcription, DNA-dependent, GO:0010093:specification of floral organ identity, GO:0019953:sexual reproduction, GO:0048316:seed development, GO:0009908:flower development, GO:0010073:meristem maintenance, GO:0003700:sequence-specific DNA binding transcription factor activity,
AT4G29080	GRMZM2G152796	AUX/IAA	PAP2 (PHYTOCHROME-ASSOCIATED PROTEIN 2); transcription factor	GO:0005634:nucleus, GO:0009733:response to auxin stimulus, GO:0006355:regulation of transcription, DNA-dependent, GO:0005622:intracellular, GO:0006417:regulation of translation, GO:0003700:sequence-specific DNA binding transcription factor activity, GO:0046983:protein dimerization activity,
AT4G12620	GRMZM2G455243	PHD	ORC1B (ORIGIN OF REPLICATION COMPLEX 1B); DNA binding / double-stranded methylated DNA binding / protein binding	GO:0003677:DNA binding, GO:0005634:nucleus, GO:0005524:ATP binding, GO:0006355:regulation of transcription, DNA-dependent, GO:0006260:DNA replication, GO:0010385:double-stranded methylated DNA binding, GO:0009567:double fertilization forming a zygote and endosperm, GO:0000808:origin recognition complex, GO:0005515:protein binding, GO:0000166:nucleotide binding, GO:0008270:zinc ion binding, GO:001…
AT4G12620	GRMZM2G168249	PHD	ORC1B (ORIGIN OF REPLICATION COMPLEX 1B); DNA binding / double-stranded methylated DNA binding / protein binding	GO:0003677:DNA binding, GO:0005634:nucleus, GO:0005524:ATP binding, GO:0006355:regulation of transcription, DNA-dependent, GO:0006260:DNA replication, GO:0010385:double-stranded methylated DNA binding, GO:0009567:double fertilization forming a zygote and endosperm, GO:0000808:origin recognition complex, GO:0005515:protein binding, GO:0000166:nucleotide binding, GO:0008270:zinc ion binding, GO:001…
AT5G66770	GRMZM2G133169	GRAS	scarecrow transcription factor family protein	GO:0005575:cellular_component, GO:0006355:regulation of transcription, DNA-dependent, GO:0003700:sequence-specific DNA binding transcription factor activity,
AT5G66770	GRMZM2G104342	GRAS	scarecrow transcription factor family protein	GO:0005575:cellular_component, GO:0006355:regulation of transcription, DNA-dependent, GO:0003700:sequence-specific DNA binding transcription factor activity,
AT3G21350	GRMZM2G017537	MED6	RNA polymerase transcriptional regulation mediator-related	GO:0006357:regulation of transcription from RNA polymerase II promoter, GO:0005515:protein binding, GO:0001104:RNA polymerase II transcription cofactor activity, GO:0016592:mediator complex,
AT1G78700	GRMZM5G812774	BES1	brassinosteroid signalling positive regulator-related	GO:0005575:cellular_component, GO:0006355:regulation of transcription, DNA-dependent, GO:0008150:biological_process,
AT4G01250	GRMZM2G038158	WRKY	WRKY22; transcription factor	GO:0010200:response to chitin, GO:0010150:leaf senescence, GO:0006355:regulation of transcription, DNA-dependent, GO:0043565:sequence-specific DNA binding, GO:0003700:sequence-specific DNA binding transcription factor activity,
AT2G34830	GRMZM2G083717	WRKY	WRKY35 (WRKY DNA-binding protein 35); transcription factor	GO:0009555:pollen development, GO:0006355:regulation of transcription, DNA-dependent, GO:0043565:sequence-specific DNA binding, GO:0003700:sequence-specific DNA binding transcription factor activity, GO:0009793:embryo development ending in seed dormancy,
AT2G45680	GRMZM2G107031	TCP	TCP family transcription factor, putative	GO:0005634:nucleus, GO:0006355:regulation of transcription, DNA-dependent, GO:0003700:sequence-specific DNA binding transcription factor activity,
AT5G13960	GRMZM2G054380	SET	SUVH4 (SU(VAR)3-9 HOMOLOG 4); double-stranded methylated DNA binding / histone methyltransferase(H3-K9 specific) / methyl-CpG binding / methyl-CpNpG binding / methyl-CpNpN binding	GO:0042393:histone binding, GO:0010216:maintenance of DNA methylation, GO:0016571:histone methylation, GO:0005634:nucleus, GO:0010385:double-stranded methylated DNA binding, GO:0051567:histone H3-K9 methylation, GO:0034968:histone lysine methylation, GO:0008327:methyl-CpG binding, GO:0010428:methyl-CpNpG binding, GO:0010429:methyl-CpNpN binding, GO:0046974:histone methyltransferase activity (H3-K…
AT3G19184	GRMZM2G111123	ABI3VP1	DNA binding	GO:0005575:cellular_component, GO:0003677:DNA binding, GO:0006355:regulation of transcription, DNA-dependent,
AT3G19184	GRMZM2G173321	ABI3VP1	DNA binding	GO:0005575:cellular_component, GO:0003677:DNA binding, GO:0006355:regulation of transcription, DNA-dependent,
AT2G26580	GRMZM2G074124	C2C2-YABBY	YAB5 (YABBY5); transcription factor	GO:0005515:protein binding, GO:0006355:regulation of transcription, DNA-dependent, GO:0003700:sequence-specific DNA binding transcription factor activity,
AT3G57040	GRMZM2G148056	Orphans	ARR9 (RESPONSE REGULATOR 9); transcription regulator/ two-component response regulator	GO:0007623:circadian rhythm, GO:0005634:nucleus, GO:0006355:regulation of transcription, DNA-dependent, GO:0005622:intracellular, GO:0009736:cytokinin mediated signaling pathway, GO:0005515:protein binding, GO:0000160:two-component signal transduction system (phosphorelay), GO:0009735:response to cytokinin stimulus, GO:0000156:two-component response regulator activity,
AT2G36026	GRMZM2G041761	OFPAT2G04845	GRMZM2G096352	GO:0003674:molecular_function, GO:0005575:cellular_component, GO:0008150:biological_process,
AT1G10200	GRMZM2G004959	LIM	WLIM1; transcription factor/ zinc ion binding	GO:0051015:actin filament binding, GO:0051017:actin filament bundle assembly, GO:0008270:zinc ion binding, GO:0015629:actin cytoskeleton, GO:0003700:sequence-specific DNA binding transcription factor activity, GO:0005886:plasma membrane,
AT3G18990	GRMZM2G001048	ABI3VP1	VRN1 (REDUCED VERNALIZATION RESPONSE 1); transcription repressor	GO:0005654:nucleoplasm, GO:0003677:DNA binding, GO:0006355:regulation of transcription, DNA-dependent, GO:0009909:regulation of flower development, GO:0010048:vernalization response,
AT3G13960	GRMZM2G105335	GRF	AtGRF5 (GROWTH-REGULATING FACTOR 5); transcription activator	GO:0005634:nucleus, GO:0005524:ATP binding, GO:0005515:protein binding, GO:0006355:regulation of transcription, DNA-dependent, GO:0016818:hydrolase activity, acting on acid anhydrides, in phosphorus-containing anhydrides, GO:0048366:leaf development,
AT3G13960	GRMZM2G041223	GRF	AtGRF5 (GROWTH-REGULATING FACTOR 5); transcription activator	GO:0005634:nucleus, GO:0005524:ATP binding, GO:0005515:protein binding, GO:0006355:regulation of transcription, DNA-dependent, GO:0016818:hydrolase activity, acting on acid anhydrides, in phosphorus-containing anhydrides, GO:0048366:leaf development,
AT3G13960	GRMZM2G034876	GRF	AtGRF5 (GROWTH-REGULATING FACTOR 5); transcription activator	GO:0005634:nucleus, GO:0005524:ATP binding, GO:0005515:protein binding, GO:0006355:regulation of transcription, DNA-dependent, GO:0016818:hydrolase activity, acting on acid anhydrides, in phosphorus-containing anhydrides, GO:0048366:leaf development,
AT1G72210	GRMZM2G082586	bHLH	basic helix-loop-helix (bHLH) family protein (bHLH096)	GO:0003677:DNA binding, GO:0003700:sequence-specific DNA binding transcription factor activity,
AT1G72210	GRMZM2G008691	bHLH	basic helix-loop-helix (bHLH) family protein (bHLH096)	GO:0003677:DNA binding, GO:0003700:sequence-specific DNA binding transcription factor activity,
AT2G46680	GRMZM2G034113	HB	ATHB-7 (ARABIDOPSIS THALIANA HOMEOBOX 7); transcription activator/ transcription factor	GO:0005634:nucleus, GO:0003677:DNA binding, GO:0009738:abscisic acid mediated signaling pathway, GO:0009414:response to water deprivation, GO:0006355:regulation of transcription, DNA-dependent, GO:0000976:transcription regulatory region sequence-specific DNA binding, GO:0009737:response to abscisic acid stimulus, GO:0045893:positive regulation of transcription, DNA-dependent, GO:0005515:protein b…
AT5G42820	GRMZM2G025014	C3H	U2AF35B; RNA binding / nucleic acid binding / nucleotide binding / zinc ion binding	GO:0003723:RNA binding, GO:0005634:nucleus, GO:0000166:nucleotide binding, GO:0008270:zinc ion binding, GO:0048573:photoperiodism, flowering, GO:0003676:nucleic acid binding,
AT5G62000	GRMZM2G006042	ARF	ARF2 (AUXIN RESPONSE FACTOR 2); protein binding / transcription factor	GO:0003677:DNA binding, GO:0010047:fruit dehiscence, GO:0010150:leaf senescence, GO:0006355:regulation of transcription, DNA-dependent, GO:0010227:floral organ abscission, GO:0009911:positive regulation of flower development, GO:0046983:protein dimerization activity, GO:0048481:ovule development, GO:0005515:protein binding, GO:0043565:sequence-specific DNA binding, GO:0003700:sequence-specific DN…
AT2G28450	GRMZM2G147623	C3H	zinc finger (CCCH-type) family protein	GO:0006396:RNA processing, GO:0005575:cellular_component, GO:0015946:methanol oxidation, GO:0008270:zinc ion binding, GO:0008173:RNA methyltransferase activity, GO:0019415:acetate biosynthetic process from carbon monoxide, GO:0003676:nucleic acid binding,
AT3G54220	GRMZM2G015080	GRAS	SCR (SCARECROW); protein binding / protein homodimerization/ sequence-specific DNA binding / transcription factor	GO:0005634:nucleus, GO:0008356:asymmetric cell division, GO:0009956:radial pattern formation, GO:0005515:protein binding, GO:0009630:gravitropism, GO:0043565:sequence-specific DNA binding, GO:0003700:sequence-specific DNA binding transcription factor activity, GO:0051457:maintenance of protein location in nucleus,
AT3G54220	GRMZM2G131516	GRAS	SCR (SCARECROW); protein binding / protein homodimerization/ sequence-specific DNA binding / transcription factor	GO:0005634:nucleus, GO:0008356:asymmetric cell division, GO:0009956:radial pattern formation, GO:0005515:protein binding, GO:0009630:gravitropism, GO:0043565:sequence-specific DNA binding, GO:0003700:sequence-specific DNA binding transcription factor activity, GO:0051457:maintenance of protein location in nucleus,
AT3G55770	GRMZM2G128206	LIM	LIM domain-containing protein	GO:0051015:actin filament binding, GO:0051017:actin filament bundle assembly, GO:0015629:actin cytoskeleton, GO:0008270:zinc ion binding,
AT5G66730	GRMZM2G171073	C2H2	zinc finger (C2H2 type) family protein	GO:0005634:nucleus, GO:0006355:regulation of transcription, DNA-dependent, GO:0005622:intracellular, GO:0010431:seed maturation, GO:0010029:regulation of seed germination, GO:0003676:nucleic acid binding, GO:0005515:protein binding, GO:0008270:zinc ion binding, GO:0009937:regulation of gibberellic acid mediated signaling pathway, GO:0003700:sequence-specific DNA binding transcription factor activ…
AT4G34430	GRMZM2G119261	MYB-related	CHB3; DNA binding / transcription factor/ zinc ion binding	GO:0003677:DNA binding, GO:0005515:protein binding, GO:0008270:zinc ion binding, GO:0003700:sequence-specific DNA binding transcription factor activity,
AT4G10920	GRMZM2G159948	Coactivator p15	KELP; DNA binding / transcription coactivator/ transcription regulator	GO:0005575:cellular_component, GO:0003677:DNA binding, GO:0005515:protein binding, GO:0003713:transcription coactivator activity, GO:0006355:regulation of transcription, DNA-dependent,
AT4G10920	GRMZM2G112535	Coactivator p15	KELP; DNA binding / transcription coactivator/ transcription regulator	GO:0005575:cellular_component, GO:0003677:DNA binding, GO:0005515:protein binding, GO:0003713:transcription coactivator activity, GO:0006355:regulation of transcription, DNA-dependent,
AT5G37020	GRMZM2G035405	ARF	ARF8 (AUXIN RESPONSE FACTOR 8); transcription factor	GO:0009733:response to auxin stimulus, GO:0003677:DNA binding, GO:0005634:nucleus, GO:0010154:fruit development, GO:0006355:regulation of transcription, DNA-dependent, GO:0046983:protein dimerization activity, GO:0009908:flower development, GO:0009725:response to hormone stimulus, GO:0003700:sequence-specific DNA binding transcription factor activity,
AT5G37020	GRMZM2G078274	ARF	ARF8 (AUXIN RESPONSE FACTOR 8); transcription factor	GO:0009733:response to auxin stimulus, GO:0003677:DNA binding, GO:0005634:nucleus, GO:0010154:fruit development, GO:0006355:regulation of transcription, DNA-dependent, GO:0046983:protein dimerization activity, GO:0009908:flower development, GO:0009725:response to hormone stimulus, GO:0003700:sequence-specific DNA binding transcription factor activity,
AT5G37020	GRMZM2G081158	ARF	ARF8 (AUXIN RESPONSE FACTOR 8); transcription factor	GO:0009733:response to auxin stimulus, GO:0003677:DNA binding, GO:0005634:nucleus, GO:0010154:fruit development, GO:0006355:regulation of transcription, DNA-dependent, GO:0046983:protein dimerization activity, GO:0009908:flower development, GO:0009725:response to hormone stimulus, GO:0003700:sequence-specific DNA binding transcription factor activity,
AT1G20693	GRMZM5G834758	HMG	HMGB2 (HIGH MOBILITY GROUP B 2); DNA binding / chromatin binding / structural constituent of chromatin / transcription factor	GO:0005634:nucleus, GO:0003677:DNA binding, GO:0006333:chromatin assembly or disassembly, GO:0000785:chromatin, GO:0030527:structural constituent of chromatin, GO:0005515:protein binding, GO:0003682:chromatin binding, GO:0003700:sequence-specific DNA binding transcription factor activity,
AT4G38900	GRMZM2G428184	bZIP	bZIP protein	GO:0003677:DNA binding, GO:0006355:regulation of transcription, DNA-dependent, GO:0005829:cytosol, GO:0043565:sequence-specific DNA binding, GO:0003700:sequence-specific DNA binding transcription factor activity, GO:0046983:protein dimerization activity,
AT5G50915	GRMZM2G178182	bHLH	basic helix-loop-helix (bHLH) family protein	GO:0003677:DNA binding, GO:0009739:response to gibberellin stimulus, GO:0003700:sequence-specific DNA binding transcription factor activity,
AT2G37060	GRMZM5G804893	CCAAT	NF-YB8 (NUCLEAR FACTOR Y, SUBUNIT B8); transcription factor	GO:0005634:nucleus, GO:0003677:DNA binding, GO:0006355:regulation of transcription, DNA-dependent, GO:0043565:sequence-specific DNA binding, GO:0005622:intracellular, GO:0003700:sequence-specific DNA binding transcription factor activity,
AT3G15030	AC205574.3_FG006	TCP	TCP4 (TCP family transcription factor 4); transcription factor	GO:0005575:cellular_component, GO:0003677:DNA binding, GO:0030154:cell differentiation, GO:0006355:regulation of transcription, DNA-dependent, GO:0009965:leaf morphogenesis, GO:0003700:sequence-specific DNA binding transcription factor activity, GO:0009793:embryo development ending in seed dormancy, GO:0048366:leaf development, GO:0045962:positive regulation of development, heterochronic,
AT3G15030	GRMZM2G015037	TCP	TCP4 (TCP family transcription factor 4); transcription factor	GO:0005575:cellular_component, GO:0003677:DNA binding, GO:0030154:cell differentiation, GO:0006355:regulation of transcription, DNA-dependent, GO:0009965:leaf morphogenesis, GO:0003700:sequence-specific DNA binding transcription factor activity, GO:0009793:embryo development ending in seed dormancy, GO:0048366:leaf development, GO:0045962:positive regulation of development, heterochronic,
AT5G11340	GRMZM2G137961	GNAT	GCN5-related N-acetyltransferase (GNAT) family protein	GO:0008152:metabolic process, GO:0008080:N-acetyltransferase activity,
AT3G01140	GRMZM2G001223	MYB	MYB106 (myb domain protein 106); DNA binding / transcription factor	GO:0003677:DNA binding, GO:0005515:protein binding, GO:0006355:regulation of transcription, DNA-dependent, GO:0010091:trichome branching, GO:0003700:sequence-specific DNA binding transcription factor activity,
AT3G01140	GRMZM2G032655	MYB	MYB106 (myb domain protein 106); DNA binding / transcription factor	GO:0003677:DNA binding, GO:0005515:protein binding, GO:0006355:regulation of transcription, DNA-dependent, GO:0010091:trichome branching, GO:0003700:sequence-specific DNA binding transcription factor activity,
AT3G55370	GRMZM2G144172	C2C2-Dof	OBP3 (OBF-BINDING PROTEIN 3); DNA binding / transcription factor	GO:0003677:DNA binding, GO:0005634:nucleus, GO:0006355:regulation of transcription, DNA-dependent, GO:0008270:zinc ion binding, GO:0009640:photomorphogenesis, GO:0003700:sequence-specific DNA binding transcription factor activity, GO:0045893:positive regulation of transcription, DNA-dependent,
AT3G55370	GRMZM5G880268	C2C2-Dof	OBP3 (OBF-BINDING PROTEIN 3); DNA binding / transcription factor	GO:0003677:DNA binding, GO:0005634:nucleus, GO:0006355:regulation of transcription, DNA-dependent, GO:0008270:zinc ion binding, GO:0009640:photomorphogenesis, GO:0003700:sequence-specific DNA binding transcription factor activity, GO:0045893:positive regulation of transcription, DNA-dependent,
AT3G55370	GRMZM2G176063	C2C2-Dof	OBP3 (OBF-BINDING PROTEIN 3); DNA binding / transcription factor	GO:0003677:DNA binding, GO:0005634:nucleus, GO:0006355:regulation of transcription, DNA-dependent, GO:0008270:zinc ion binding, GO:0009640:photomorphogenesis, GO:0003700:sequence-specific DNA binding transcription factor activity, GO:0045893:positive regulation of transcription, DNA-dependent,
AT4G08455	GRMZM2G320703	TRAF	BTB/POZ domain-containing protein	GO:0005515:protein binding,
AT1G30490	GRMZM2G023291	HB	PHV (PHAVOLUTA); DNA binding / protein binding / transcription factor	GO:0005634:nucleus, GO:0003677:DNA binding, GO:0009855:determination of bilateral symmetry, GO:0006355:regulation of transcription, DNA-dependent, GO:0009943:adaxial/abaxial axis specification, GO:0010014:meristem initiation, GO:0010072:primary shoot apical meristem specification, GO:0009880:embryonic pattern specification, GO:0005515:protein binding, GO:0080060:integument development, GO:0043565…
AT2G22540	GRMZM2G046885	MADS	SVP (SHORT VEGETATIVE PHASE); transcription factor/ translation repressor, nucleic acid binding	GO:0045892:negative regulation of transcription, DNA-dependent, GO:0003677:DNA binding, GO:0005634:nucleus, GO:0006355:regulation of transcription, DNA-dependent, GO:0010582:floral meristem determinacy, GO:0010076:maintenance of floral meristem identity, GO:0048438:floral whorl development, GO:0009266:response to temperature stimulus, GO:0046983:protein dimerization activity, GO:0009910:negative …
AT4G11400	GRMZM2G424651	ARID	ARID/BRIGHT DNA-binding domain-containing protein / ELM2 domain-containing protein / Myb-like DNA-binding domain-containing protein	GO:0003677:DNA binding, GO:0005622:intracellular, GO:0005773:vacuole,
AT4G22140	GRMZM2G091265	PHD	DNA binding / protein binding / zinc ion binding	GO:0005575:cellular_component, GO:0003677:DNA binding, GO:0005515:protein binding, GO:0006355:regulation of transcription, DNA-dependent, GO:0009845:seed germination, GO:0008270:zinc ion binding, GO:0009911:positive regulation of flower development,
AT5G25830	GRMZM2G135381	C2C2-GATA	zinc finger (GATA type) family protein	GO:0007623:circadian rhythm, GO:0003677:DNA binding, GO:0005634:nucleus, GO:0006355:regulation of transcription, DNA-dependent, GO:0009416:response to light stimulus, GO:0045893:positive regulation of transcription, DNA-dependent, GO:0043565:sequence-specific DNA binding, GO:0008270:zinc ion binding, GO:0003700:sequence-specific DNA binding transcription factor activity,
AT5G25830	AC202864.3_FG002	C2C2-GATA	zinc finger (GATA type) family protein	GO:0007623:circadian rhythm, GO:0003677:DNA binding, GO:0005634:nucleus, GO:0006355:regulation of transcription, DNA-dependent, GO:0009416:response to light stimulus, GO:0045893:positive regulation of transcription, DNA-dependent, GO:0043565:sequence-specific DNA binding, GO:0008270:zinc ion binding, GO:0003700:sequence-specific DNA binding transcription factor activity,
AT5G25830	GRMZM2G163200	C2C2-GATA	zinc finger (GATA type) family protein	GO:0007623:circadian rhythm, GO:0003677:DNA binding, GO:0005634:nucleus, GO:0006355:regulation of transcription, DNA-dependent, GO:0009416:response to light stimulus, GO:0045893:positive regulation of transcription, DNA-dependent, GO:0043565:sequence-specific DNA binding, GO:0008270:zinc ion binding, GO:0003700:sequence-specific DNA binding transcription factor activity,
AT5G25830	GRMZM2G379005	C2C2-GATA	zinc finger (GATA type) family protein	GO:0007623:circadian rhythm, GO:0003677:DNA binding, GO:0005634:nucleus, GO:0006355:regulation of transcription, DNA-dependent, GO:0009416:response to light stimulus, GO:0045893:positive regulation of transcription, DNA-dependent, GO:0043565:sequence-specific DNA binding, GO:0008270:zinc ion binding, GO:0003700:sequence-specific DNA binding transcription factor activity,
AT3G48430	GRMZM2G339379	C2H2	REF6 (RELATIVE OF EARLY FLOWERING 6); nucleic acid binding / transcription factor/ zinc ion binding	GO:0009826:unidimensional cell growth, GO:0005634:nucleus, GO:0009741:response to brassinosteroid stimulus, GO:0005622:intracellular, GO:0010228:vegetative to reproductive phase transition of meristem, GO:0003676:nucleic acid binding, GO:0035067:negative regulation of histone acetylation, GO:0005515:protein binding, GO:0033169:histone H3-K9 demethylation, GO:0008270:zinc ion binding, GO:0003700:s…
AT5G05130	GRMZM2G148249	SNF2	SNF2 domain-containing protein / helicase domain-containing protein / RING finger domain-containing protein	GO:0003677:DNA binding, GO:0005515:protein binding, GO:0005524:ATP binding, GO:0016818:hydrolase activity, acting on acid anhydrides, in phosphorus-containing anhydrides, GO:0008270:zinc ion binding, GO:0004386:helicase activity, GO:0003676:nucleic acid binding,
AT1G69780	GRMZM2G097349	HB	ATHB13; DNA binding / sequence-specific DNA binding / transcription factor	GO:0005634:nucleus, GO:0003677:DNA binding, GO:0006355:regulation of transcription, DNA-dependent, GO:0000976:transcription regulatory region sequence-specific DNA binding, GO:0009965:leaf morphogenesis, GO:0009744:response to sucrose stimulus, GO:0005515:protein binding, GO:0043565:sequence-specific DNA binding, GO:0048826:cotyledon morphogenesis, GO:0003700:sequence-specific DNA binding transcr…
AT1G69780	GRMZM5G803812	HB	ATHB13; DNA binding / sequence-specific DNA binding / transcription factor	GO:0005634:nucleus, GO:0003677:DNA binding, GO:0006355:regulation of transcription, DNA-dependent, GO:0000976:transcription regulatory region sequence-specific DNA binding, GO:0009965:leaf morphogenesis, GO:0009744:response to sucrose stimulus, GO:0005515:protein binding, GO:0043565:sequence-specific DNA binding, GO:0048826:cotyledon morphogenesis, GO:0003700:sequence-specific DNA binding transcr…
AT1G69780	GRMZM2G139963	HB	ATHB13; DNA binding / sequence-specific DNA binding / transcription factor	GO:0005634:nucleus, GO:0003677:DNA binding, GO:0006355:regulation of transcription, DNA-dependent, GO:0000976:transcription regulatory region sequence-specific DNA binding, GO:0009965:leaf morphogenesis, GO:0009744:response to sucrose stimulus, GO:0005515:protein binding, GO:0043565:sequence-specific DNA binding, GO:0048826:cotyledon morphogenesis, GO:0003700:sequence-specific DNA binding transcr…
AT1G16070	GRMZM2G472945	TUB	AtTLP8 (TUBBY LIKE PROTEIN 8); transcription factor	GO:0005575:cellular_component, GO:0006355:regulation of transcription, DNA-dependent, GO:0003700:sequence-specific DNA binding transcription factor activity,
AT5G28040	GRMZM2G030458	GeBP	transcription regulator	GO:0006355:regulation of transcription, DNA-dependent,
AT5G28040	GRMZM2G026417	GeBP	transcription regulator	GO:0006355:regulation of transcription, DNA-dependent,
AT4G38070	GRMZM2G351304	bHLH	bHLH family protein	GO:0003677:DNA binding, GO:0005739:mitochondrion, GO:0003700:sequence-specific DNA binding transcription factor activity,
AT5G06550	GRMZM2G078198	JumonjiAT5G50570	GRMZM5G878561	GO:0003674:molecular_function, GO:0005515:protein binding, GO:0007166:cell surface receptor signaling pathway,
AT3G04580	GRMZM2G075368	Orphans	EIN4 (ETHYLENE INSENSITIVE 4); ethylene binding / glycogen synthase kinase 3/ protein histidine kinase/ receptor	GO:0016020:membrane, GO:0005783:endoplasmic reticulum, GO:0009873:ethylene mediated signaling pathway, GO:0005524:ATP binding, GO:0006355:regulation of transcription, DNA-dependent, GO:0004673:protein histidine kinase activity, GO:0005515:protein binding, GO:0000160:two-component signal transduction system (phosphorelay), GO:0004871:signal transducer activity, GO:0000156:two-component response re…
AT5G60200	GRMZM2G134545	C2C2-Dof	Dof-type zinc finger domain-containing protein	GO:0005634:nucleus, GO:0003677:DNA binding, GO:0006355:regulation of transcription, DNA-dependent, GO:0008270:zinc ion binding, GO:0048364:root development, GO:0003700:sequence-specific DNA binding transcription factor activity,
AT5G65640	GRMZM2G128807	bHLH	bHLH093 (beta HLH protein 93); DNA binding / transcription factor	GO:0003677:DNA binding, GO:0003700:sequence-specific DNA binding transcription factor activity,
AT4G37740	GRMZM2G178261	GRF	AtGRF2 (GROWTHREGULATING FACTOR 2); transcription activator	GO:0005634:nucleus, GO:0005524:ATP binding, GO:0005515:protein binding, GO:0006355:regulation of transcription, DNA-dependent, GO:0016818:hydrolase activity, acting on acid anhydrides, in phosphorus-containing anhydrides, GO:0048366:leaf development,
AT1G05120	GRMZM2G021233	SNF2	SNF2 domain-containing protein / helicase domain-containing protein / RING finger domain-containing protein	GO:0003677:DNA binding, GO:0005515:protein binding, GO:0005524:ATP binding, GO:0008270:zinc ion binding, GO:0004386:helicase activity, GO:0003676:nucleic acid binding,
AT3G12280	GRMZM2G016997	RB	RBR1 (RETINOBLASTOMA-RELATED 1); transcription factor binding	GO:0032875:regulation of DNA endoreduplication, GO:0003677:DNA binding, GO:0022619:generative cell differentiation, GO:0009555:pollen development, GO:0006349:regulation of gene expression by genetic imprinting, GO:0009567:double fertilization forming a zygote and endosperm, GO:2000036:regulation of stem cell maintenance, GO:0005515:protein binding, GO:0005829:cytosol, GO:0009553:embryo sac develo…
AT2G22840	GRMZM2G178261	GRF	AtGRF1 (GROWTH-REGULATING FACTOR 1); transcription activator	GO:0005634:nucleus, GO:0005524:ATP binding, GO:0009624:response to nematode, GO:0048364:root development, GO:0005515:protein binding, GO:0016818:hydrolase activity, acting on acid anhydrides, in phosphorus-containing anhydrides, GO:0061062:regulation of nematode larval development, GO:0048366:leaf development,
AT2G22840	GRMZM5G853392	GRF	AtGRF1 (GROWTH-REGULATING FACTOR 1); transcription activator	GO:0005634:nucleus, GO:0005524:ATP binding, GO:0009624:response to nematode, GO:0048364:root development, GO:0005515:protein binding, GO:0016818:hydrolase activity, acting on acid anhydrides, in phosphorus-containing anhydrides, GO:0061062:regulation of nematode larval development, GO:0048366:leaf development,
AT4G23800	GRMZM2G060253	HMG	high mobility group (HMG1/2) family protein	GO:0000793:condensed chromosome, GO:0003677:DNA binding, GO:0005515:protein binding, GO:0000794:condensed nuclear chromosome, GO:0003700:sequence-specific DNA binding transcription factor activity,
AT1G59640	GRMZM2G008898	bHLH	ZCW32; DNA binding / transcription factor	GO:0003677:DNA binding, GO:0048446:petal morphogenesis, GO:0006355:regulation of transcription, DNA-dependent, GO:0003700:sequence-specific DNA binding transcription factor activity,
AT1G19850	GRMZM2G034840	ARF	MP (MONOPTEROS); transcription factor	GO:0016020:membrane, GO:0010051:xylem and phloem pattern formation, GO:0009733:response to auxin stimulus, GO:0003677:DNA binding, GO:0006355:regulation of transcription, DNA-dependent, GO:0010305:leaf vascular tissue pattern formation, GO:0046983:protein dimerization activity, GO:0005515:protein binding, GO:0003700:sequence-specific DNA binding transcription factor activity, GO:0005634:nucleus, …
AT3G26744	GRMZM2G173534	bHLH	ICE1 (INDUCER OF CBF EXPRESSION 1); DNA binding / transcription activator/ transcription factor	GO:0005634:nucleus, GO:0003677:DNA binding, GO:0009409:response to cold, GO:0016567:protein ubiquitination, GO:0050826:response to freezing, GO:0045893:positive regulation of transcription, DNA-dependent, GO:0010440:stomatal lineage progression, GO:0003700:sequence-specific DNA binding transcription factor activity,
AT3G26744	GRMZM2G172297	bHLH	ICE1 (INDUCER OF CBF EXPRESSION 1); DNA binding / transcription activator/ transcription factor	GO:0005634:nucleus, GO:0003677:DNA binding, GO:0009409:response to cold, GO:0016567:protein ubiquitination, GO:0050826:response to freezing, GO:0045893:positive regulation of transcription, DNA-dependent, GO:0010440:stomatal lineage progression, GO:0003700:sequence-specific DNA binding transcription factor activity,
AT3G26744	GRMZM2G033356	bHLH	ICE1 (INDUCER OF CBF EXPRESSION 1); DNA binding / transcription activator/ transcription factor	GO:0005634:nucleus, GO:0003677:DNA binding, GO:0009409:response to cold, GO:0016567:protein ubiquitination, GO:0050826:response to freezing, GO:0045893:positive regulation of transcription, DNA-dependent, GO:0010440:stomatal lineage progression, GO:0003700:sequence-specific DNA binding transcription factor activity,
AT5G09250	GRMZM2G090213	Coactivator p15	KIWI; DNA binding / protein binding / transcription coactivator	GO:0003677:DNA binding, GO:0003713:transcription coactivator activity, GO:0005515:protein binding, GO:0006355:regulation of transcription, DNA-dependent,
AT4G38620	GRMZM2G089244	MYB	MYB4; DNA binding / transcription factor	GO:0009751:response to salicylic acid stimulus, GO:0045892:negative regulation of transcription, DNA-dependent, GO:0003677:DNA binding, GO:0005515:protein binding, GO:0009753:response to jasmonic acid stimulus, GO:0003700:sequence-specific DNA binding transcription factor activity, GO:0010224:response to UV-B,
AT1G35560	GRMZM2G003944	TCP	TCP family transcription factor, putative	GO:0006355:regulation of transcription, DNA-dependent, GO:0003700:sequence-specific DNA binding transcription factor activity, GO:0009507:chloroplast,
AT3G16770	GRMZM2G085964	AP2-EREBP	ATEBP (ETHYLENE-RESPONSIVE ELEMENT BINDING PROTEIN); DNA binding / protein binding / transcription activator/ transcription factor	GO:0003677:DNA binding, GO:0005634:nucleus, GO:0009873:ethylene mediated signaling pathway, GO:0006355:regulation of transcription, DNA-dependent, GO:0006950:response to stress, GO:0008219:cell death, GO:0009753:response to jasmonic acid stimulus, GO:0009723:response to ethylene stimulus, GO:0005737:cytoplasm, GO:0045893:positive regulation of transcription, DNA-dependent, GO:0005515:protein bind…
AT5G08130	GRMZM2G317450	bHLH	BIM1; DNA binding / protein binding / transcription factor	GO:0003677:DNA binding, GO:0005515:protein binding, GO:0006355:regulation of transcription, DNA-dependent, GO:0009742:brassinosteroid mediated signaling pathway, GO:0003700:sequence-specific DNA binding transcription factor activity,
AT2G41710	GRMZM2G013657	AP2-EREBP	ovule development protein, putative	GO:0005634:nucleus, GO:0003677:DNA binding, GO:0006355:regulation of transcription, DNA-dependent, GO:0003700:sequence-specific DNA binding transcription factor activity,
AT5G06710	GRMZM2G106276	HB	HAT14 (HOMEOBOX FROM ARABIDOPSIS THALIANA); DNA binding / transcription factor	GO:0005634:nucleus, GO:0003677:DNA binding, GO:0005515:protein binding, GO:0006355:regulation of transcription, DNA-dependent, GO:0043565:sequence-specific DNA binding, GO:0003700:sequence-specific DNA binding transcription factor activity,
AT5G06710	GRMZM2G134260	HB	HAT14 (HOMEOBOX FROM ARABIDOPSIS THALIANA); DNA binding / transcription factor	GO:0005634:nucleus, GO:0003677:DNA binding, GO:0005515:protein binding, GO:0006355:regulation of transcription, DNA-dependent, GO:0043565:sequence-specific DNA binding, GO:0003700:sequence-specific DNA binding transcription factor activity,
AT1G33420	GRMZM2G068331	PHD	PHD finger family protein	GO:0003677:DNA binding, GO:0005515:protein binding, GO:0006355:regulation of transcription, DNA-dependent, GO:0008270:zinc ion binding,
AT4G00730	GRMZM2G004957	HB	ANL2 (ANTHOCYANINLESS 2); transcription factor/ transcription regulator	GO:0005634:nucleus, GO:0006355:regulation of transcription, DNA-dependent, GO:0048364:root development, GO:0048765:root hair cell differentiation, GO:0043481:anthocyanin accumulation in tissues in response to UV light, GO:0005515:protein binding, GO:0043565:sequence-specific DNA binding, GO:0003700:sequence-specific DNA binding transcription factor activity,
AT4G13460	GRMZM2G165011	SET	SUVH9; histone-lysine N-methyltransferase/ zinc ion binding	GO:0042393:histone binding, GO:0005634:nucleus, GO:0005515:protein binding, GO:0008270:zinc ion binding, GO:0009294:DNA mediated transformation, GO:0034968:histone lysine methylation, GO:0018024:histone-lysine N-methyltransferase activity,
AT2G42200	GRMZM2G160917	SBP	SPL9 (SQUAMOSA PROMOTER BINDING PROTEIN-LIKE 9); transcription factor	GO:0048653:anther development, GO:0003677:DNA binding, GO:0005634:nucleus, GO:0006355:regulation of transcription, DNA-dependent, GO:0010228:vegetative to reproductive phase transition of meristem, GO:0003700:sequence-specific DNA binding transcription factor activity, GO:2000025:regulation of leaf formation, GO:0048366:leaf development,
AT2G42200	GRMZM2G307588	SBP	SPL9 (SQUAMOSA PROMOTER BINDING PROTEIN-LIKE 9); transcription factor	GO:0048653:anther development, GO:0003677:DNA binding, GO:0005634:nucleus, GO:0006355:regulation of transcription, DNA-dependent, GO:0010228:vegetative to reproductive phase transition of meristem, GO:0003700:sequence-specific DNA binding transcription factor activity, GO:2000025:regulation of leaf formation, GO:0048366:leaf development,
AT2G42200	GRMZM2G126018	SBP	SPL9 (SQUAMOSA PROMOTER BINDING PROTEIN-LIKE 9); transcription factor	GO:0048653:anther development, GO:0003677:DNA binding, GO:0005634:nucleus, GO:0006355:regulation of transcription, DNA-dependent, GO:0010228:vegetative to reproductive phase transition of meristem, GO:0003700:sequence-specific DNA binding transcription factor activity, GO:2000025:regulation of leaf formation, GO:0048366:leaf development,
AT2G42200	GRMZM2G460544	SBP	SPL9 (SQUAMOSA PROMOTER BINDING PROTEIN-LIKE 9); transcription factor	GO:0048653:anther development, GO:0003677:DNA binding, GO:0005634:nucleus, GO:0006355:regulation of transcription, DNA-dependent, GO:0010228:vegetative to reproductive phase transition of meristem, GO:0003700:sequence-specific DNA binding transcription factor activity, GO:2000025:regulation of leaf formation, GO:0048366:leaf development,
AT1G34355	GRMZM2G133716	FHA	forkhead-associated domain-containing protein / FHA domain-containing protein	GO:0005575:cellular_component, GO:0005515:protein binding, GO:0009555:pollen development,
AT1G50420	GRMZM2G129154	GRAS	SCL3; transcription factor	GO:0005634:nucleus, GO:0006355:regulation of transcription, DNA-dependent, GO:0009739:response to gibberellin stimulus, GO:0003700:sequence-specific DNA binding transcription factor activity,
AT2G29660	GRMZM2G093305	C2H2	zinc finger (C2H2 type) family protein	GO:0006355:regulation of transcription, DNA-dependent, GO:0005622:intracellular, GO:0008270:zinc ion binding, GO:0031225:anchored to membrane, GO:0003700:sequence-specific DNA binding transcription factor activity, GO:0003676:nucleic acid binding,
AT4G39410	GRMZM2G151444	WRKY	WRKY13; transcription factor	GO:0006355:regulation of transcription, DNA-dependent, GO:0043565:sequence-specific DNA binding, GO:0003700:sequence-specific DNA binding transcription factor activity, GO:0009507:chloroplast,
AT1G58100	GRMZM2G089638	TCP	TCP family transcription factor, putative	GO:0005575:cellular_component, GO:0006355:regulation of transcription, DNA-dependent, GO:0003700:sequence-specific DNA binding transcription factor activity, GO:0001047:core promoter binding,
AT1G58100	GRMZM2G093895	TCP	TCP family transcription factor, putative	GO:0005575:cellular_component, GO:0006355:regulation of transcription, DNA-dependent, GO:0003700:sequence-specific DNA binding transcription factor activity, GO:0001047:core promoter binding,
AT1G58100	GRMZM2G096610	TCP	TCP family transcription factor, putative	GO:0005575:cellular_component, GO:0006355:regulation of transcription, DNA-dependent, GO:0003700:sequence-specific DNA binding transcription factor activity, GO:0001047:core promoter binding,
AT4G32980	GRMZM2G161435	HB	ATH1 (ARABIDOPSIS THALIANA HOMEOBOX GENE 1); DNA binding / sequence-specific DNA binding / transcription factor	GO:0005634:nucleus, GO:0003677:DNA binding, GO:0006355:regulation of transcription, DNA-dependent, GO:0010371:regulation of gibberellin biosynthetic process, GO:0009640:photomorphogenesis, GO:0010228:vegetative to reproductive phase transition of meristem, GO:0010227:floral organ abscission, GO:0005515:protein binding, GO:0043565:sequence-specific DNA binding, GO:0003700:sequence-specific DNA bin…
AT4G32980	GRMZM2G076272	HB	ATH1 (ARABIDOPSIS THALIANA HOMEOBOX GENE 1); DNA binding / sequence-specific DNA binding / transcription factor	GO:0005634:nucleus, GO:0003677:DNA binding, GO:0006355:regulation of transcription, DNA-dependent, GO:0010371:regulation of gibberellin biosynthetic process, GO:0009640:photomorphogenesis, GO:0010228:vegetative to reproductive phase transition of meristem, GO:0010227:floral organ abscission, GO:0005515:protein binding, GO:0043565:sequence-specific DNA binding, GO:0003700:sequence-specific DNA bin…
AT1G75080	GRMZM2G102514	BES1	BZR1 (BRASSINAZOLE-RESISTANT 1); DNA binding / transcription regulator/ transcription repressor	GO:0045892:negative regulation of transcription, DNA-dependent, GO:0003677:DNA binding, GO:0005634:nucleus, GO:0005515:protein binding, GO:0005829:cytosol, GO:0006355:regulation of transcription, DNA-dependent, GO:0009742:brassinosteroid mediated signaling pathway,
AT1G05230	GRMZM2G026643	HB	HDG2 (HOMEODOMAIN GLABROUS 2); DNA binding / transcription factor	GO:0003677:DNA binding, GO:0005634:nucleus, GO:0005515:protein binding, GO:0006355:regulation of transcription, DNA-dependent, GO:0043565:sequence-specific DNA binding, GO:0010090:trichome morphogenesis, GO:0003700:sequence-specific DNA binding transcription factor activity,
AT1G05230	GRMZM2G145690	HB	HDG2 (HOMEODOMAIN GLABROUS 2); DNA binding / transcription factor	GO:0003677:DNA binding, GO:0005634:nucleus, GO:0005515:protein binding, GO:0006355:regulation of transcription, DNA-dependent, GO:0043565:sequence-specific DNA binding, GO:0010090:trichome morphogenesis, GO:0003700:sequence-specific DNA binding transcription factor activity,
AT1G05230	GRMZM2G004334	HB	HDG2 (HOMEODOMAIN GLABROUS 2); DNA binding / transcription factor	GO:0003677:DNA binding, GO:0005634:nucleus, GO:0005515:protein binding, GO:0006355:regulation of transcription, DNA-dependent, GO:0043565:sequence-specific DNA binding, GO:0010090:trichome morphogenesis, GO:0003700:sequence-specific DNA binding transcription factor activity,
AT1G05230	GRMZM2G126646	HB	HDG2 (HOMEODOMAIN GLABROUS 2); DNA binding / transcription factor	GO:0003677:DNA binding, GO:0005634:nucleus, GO:0005515:protein binding, GO:0006355:regulation of transcription, DNA-dependent, GO:0043565:sequence-specific DNA binding, GO:0010090:trichome morphogenesis, GO:0003700:sequence-specific DNA binding transcription factor activity,
